# Supplementary material for: Convenient synthesis of functionalized pyrrolo[3,4-b]pyridines and pyrrolo[3,4-b]quinolines via three-component reactions
Source: Royal Society of Chemistry journal article supplement (doi:10.1039/c6ra03165j), 2016-01-01

**Convenient synthesis of functionalized pyrrolo[3,4-*b*]pyridines and pyrrolo[3,4-*b*]quinolines via three-component reactions**

**Yan-Hong Jiang, Man Xiao, Chao-Guo Yan\***

**Supporting Information**

|                                                                      |             |
|----------------------------------------------------------------------|-------------|
| <b>ORTEP-drawings of the crystal structures</b>                      | <b>2</b>    |
| <b><sup>1</sup>H and <sup>13</sup>C NMR spectra of the compounds</b> | <b>3-33</b> |

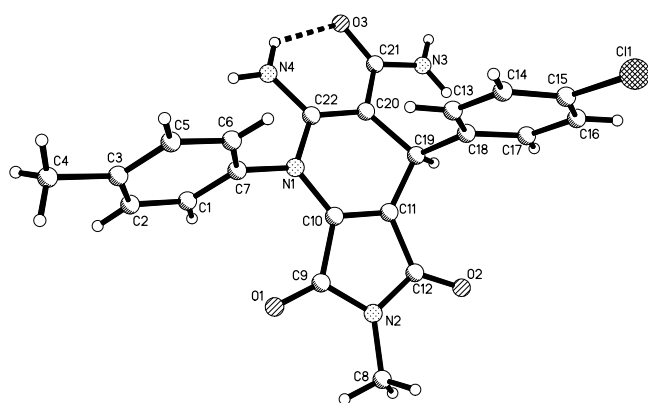

Fig. s1 ORTEP-drawings of the crystal structures of **1p**

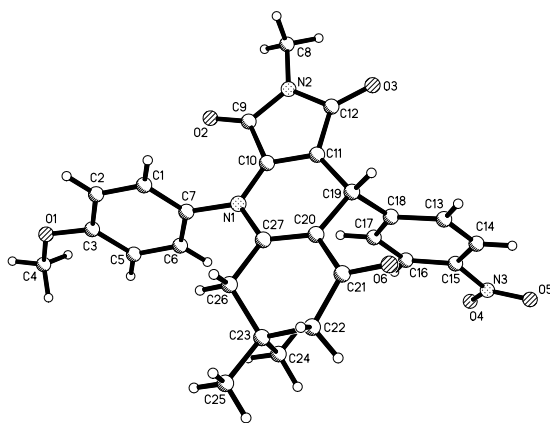

Fig. s2 ORTEP-drawings of the crystal structures of **3g**

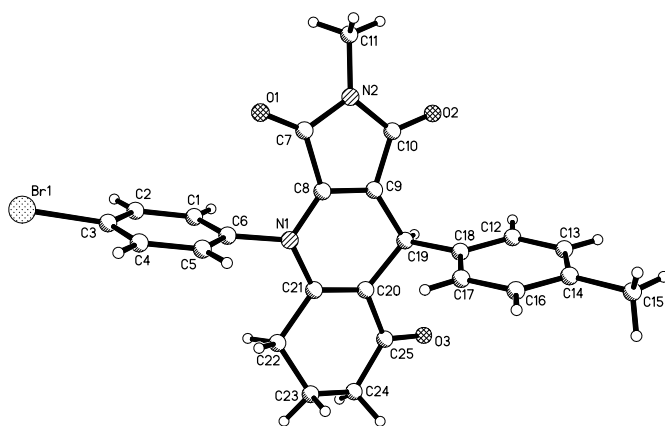

Fig. s3 ORTEP-drawings of the crystal structures of **3j**

**2-Amino-1-benzyl-4-(4-methoxyphenyl)-6-methyl-5,7-dioxo-4,5,6,7-tetrahydro-1H-pyrrolo[3,4-b]pyridine-3-carbonitrile (1a):**

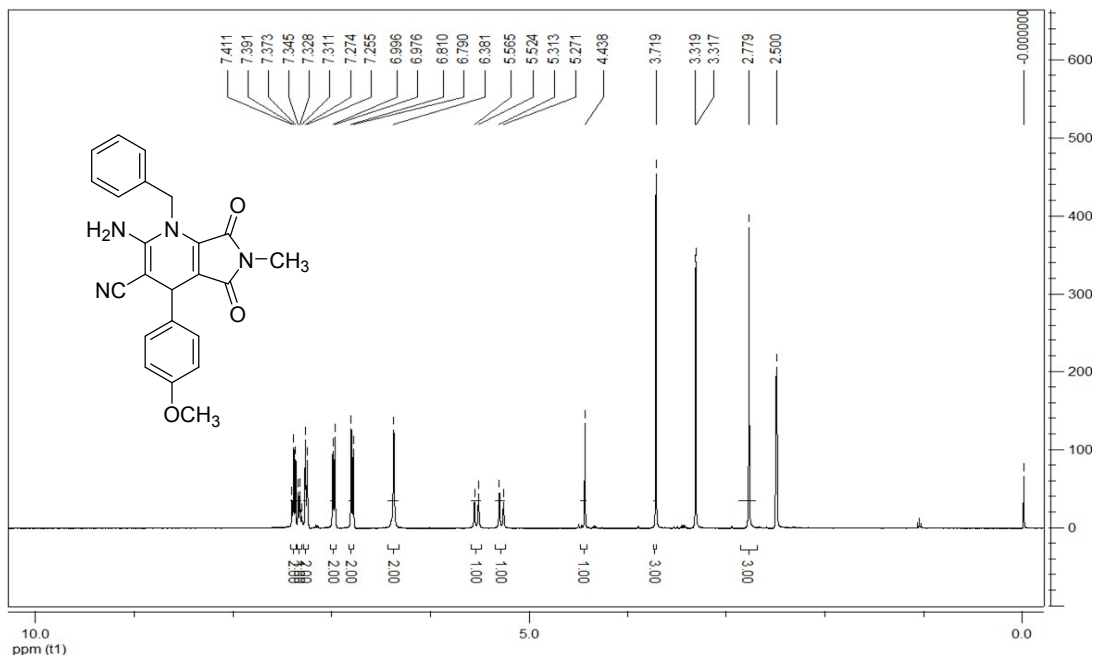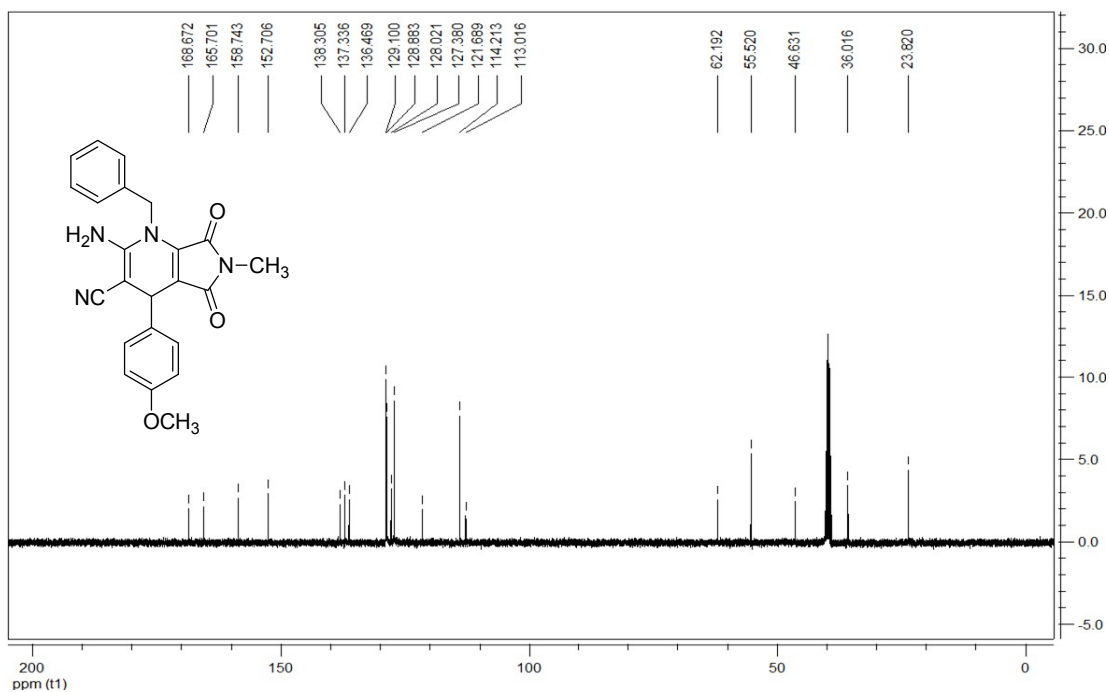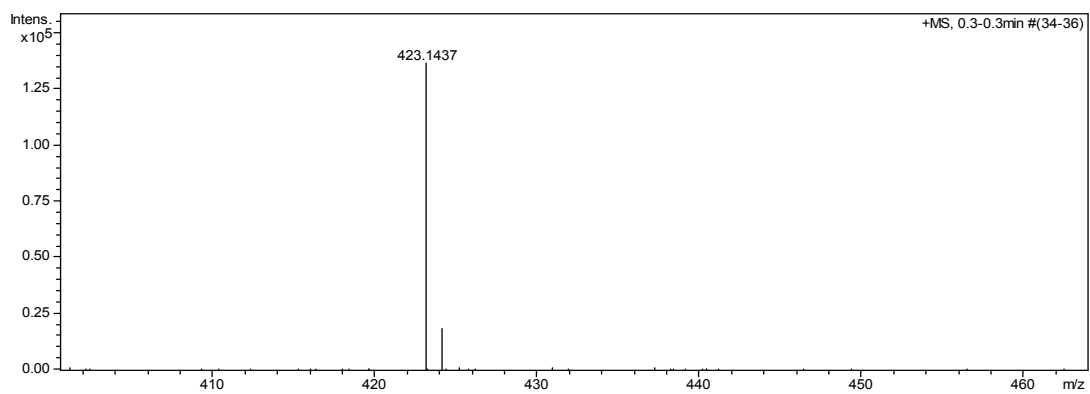

**2-Amino-1-benzyl-6-methyl-5,7-dioxo-4-(*p*-tolyl)-4,5,6,7-tetrahydro-1*H*-pyrrolo[3,4-*b*]pyridine-3-carbonitrile (1b):**

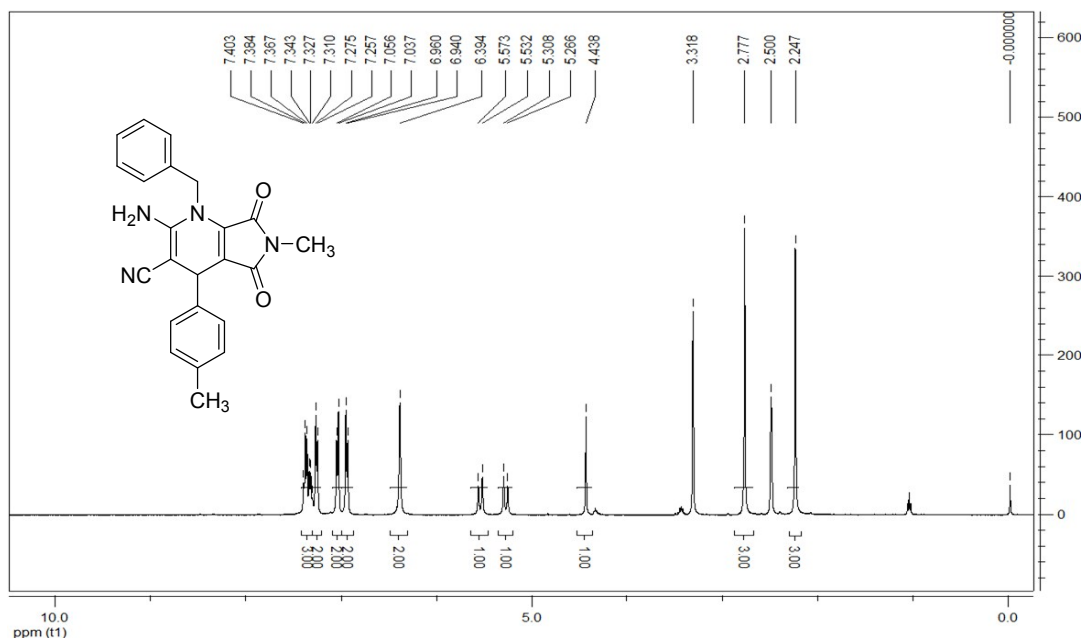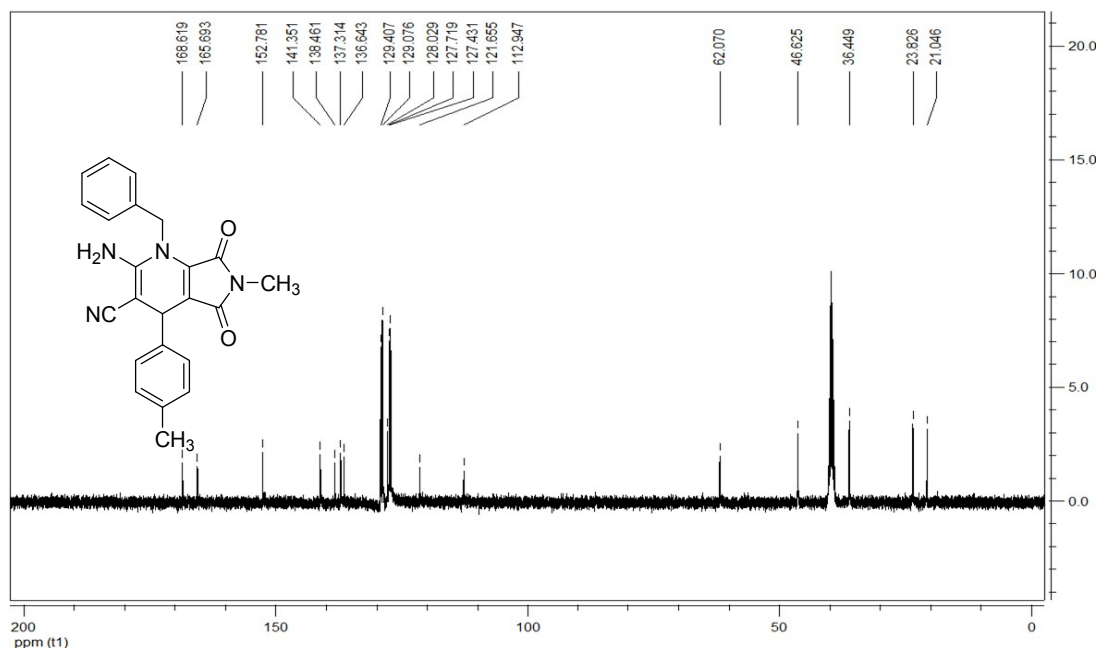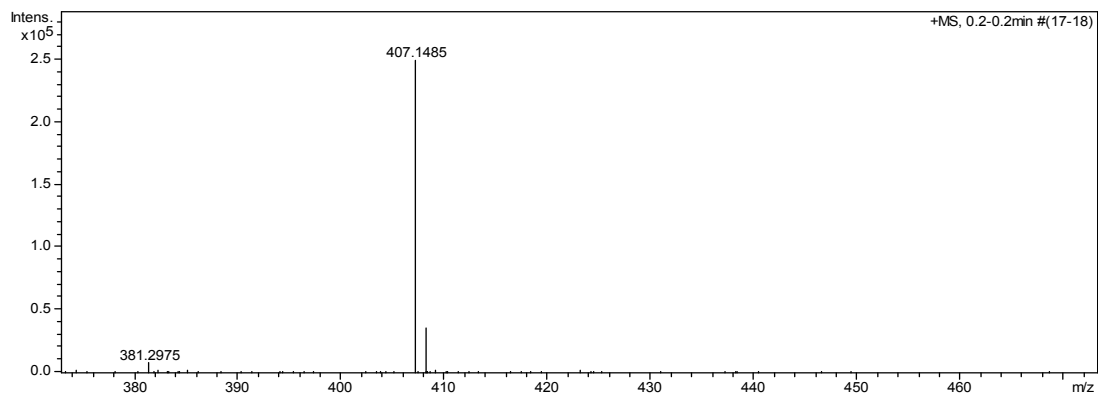

**2-Amino-1-benzyl-4-(4-chlorophenyl)-6-methyl-5,7-dioxo-4,5,6,7-tetrahydro-1H-pyrrolo[3,4-b]pyridine-3-carbonitrile (1c):**

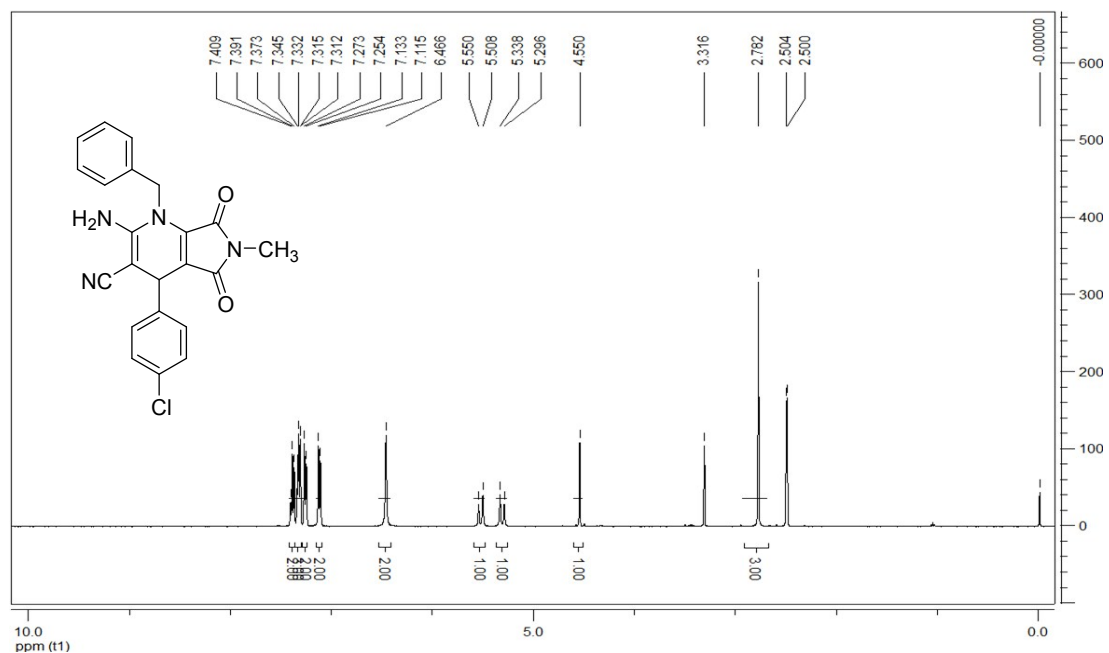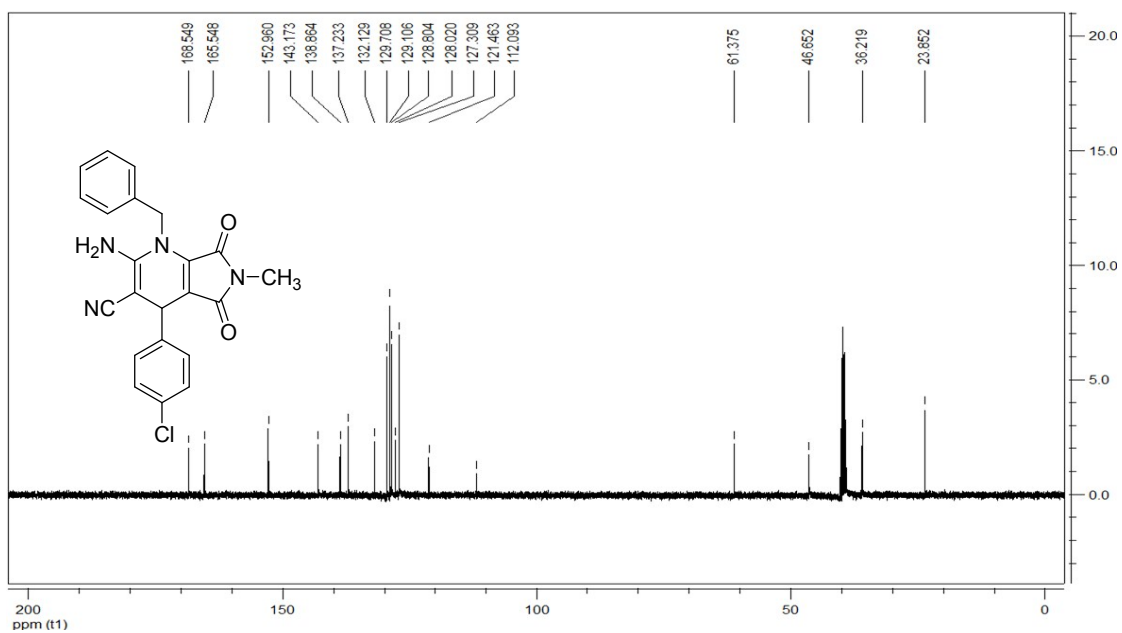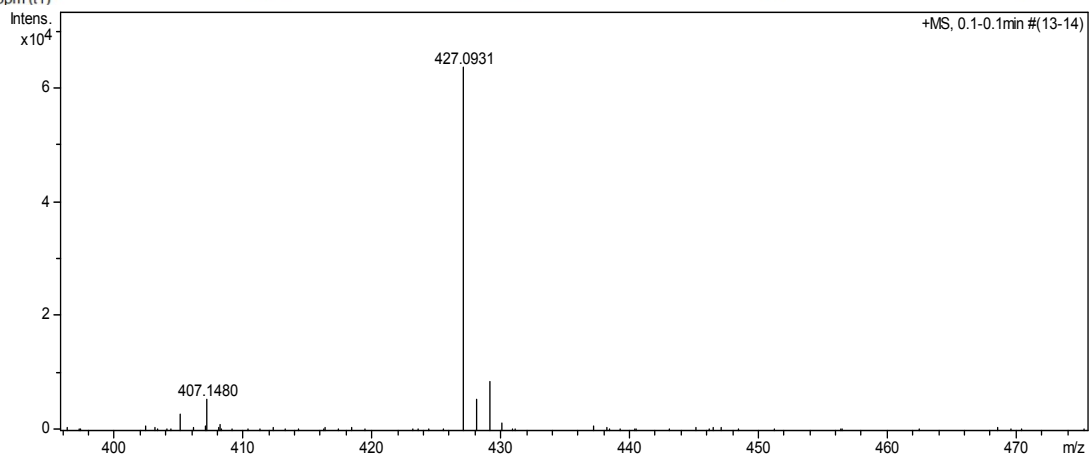

**2-Amino-6-methyl-5,7-dioxo-1,4-di-p-tolyl-4,5,6,7-tetrahydro-1H-pyrrolo[3,4-b]pyridine-3-carbonitrile (1d):**

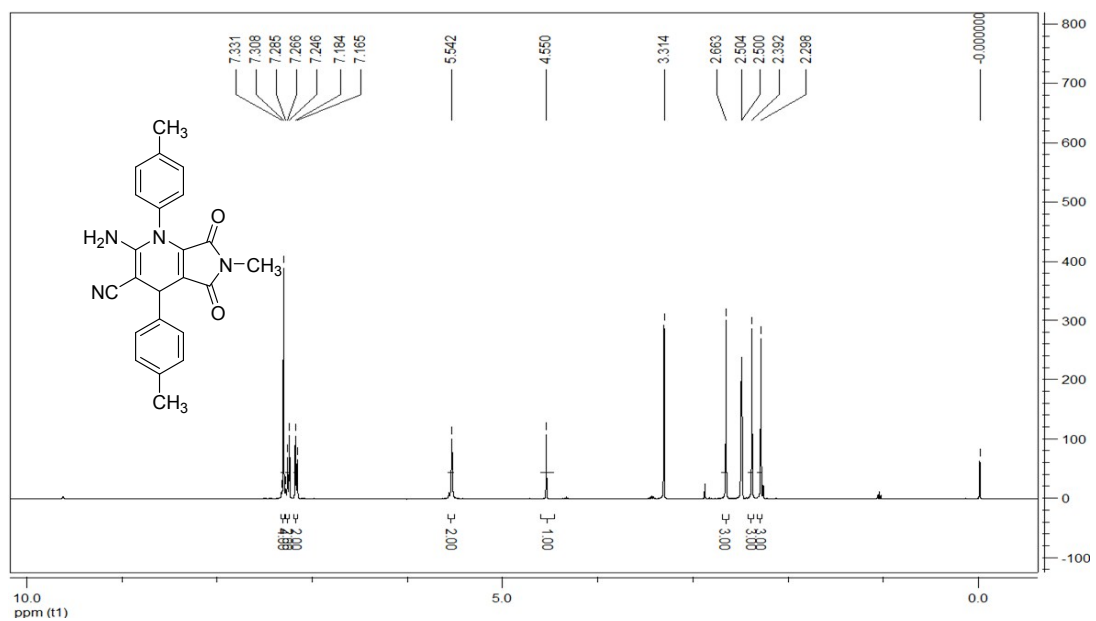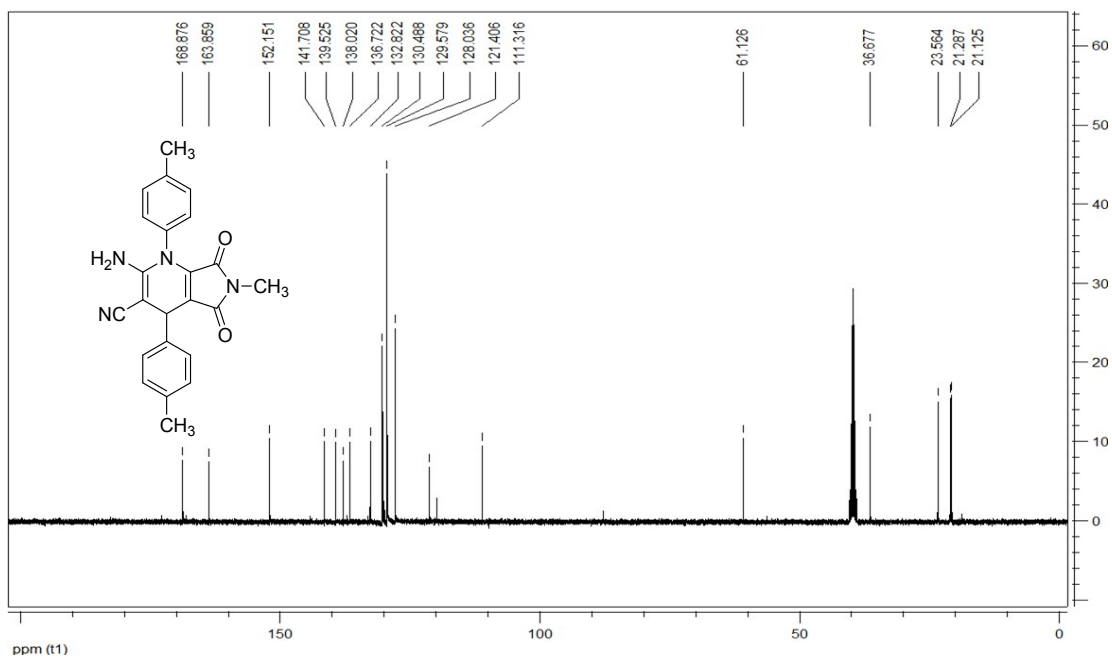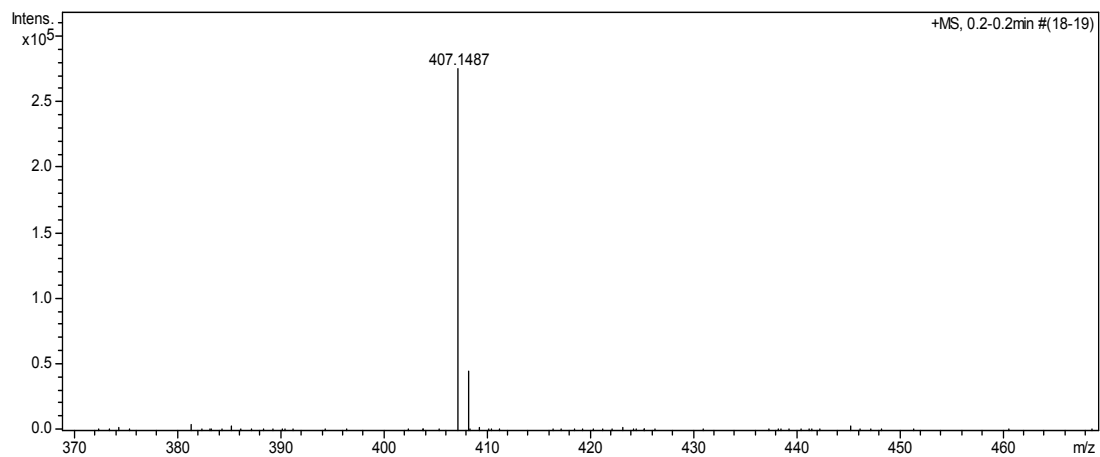

**2-Amino-4-(4-chlorophenyl)-6-methyl-5,7-dioxo-1-(*p*-tolyl)-4,5,6,7-tetrahydro-1*H*-pyrrolo[3,4-*b*]pyridine-3-carbonitrile (1e):**

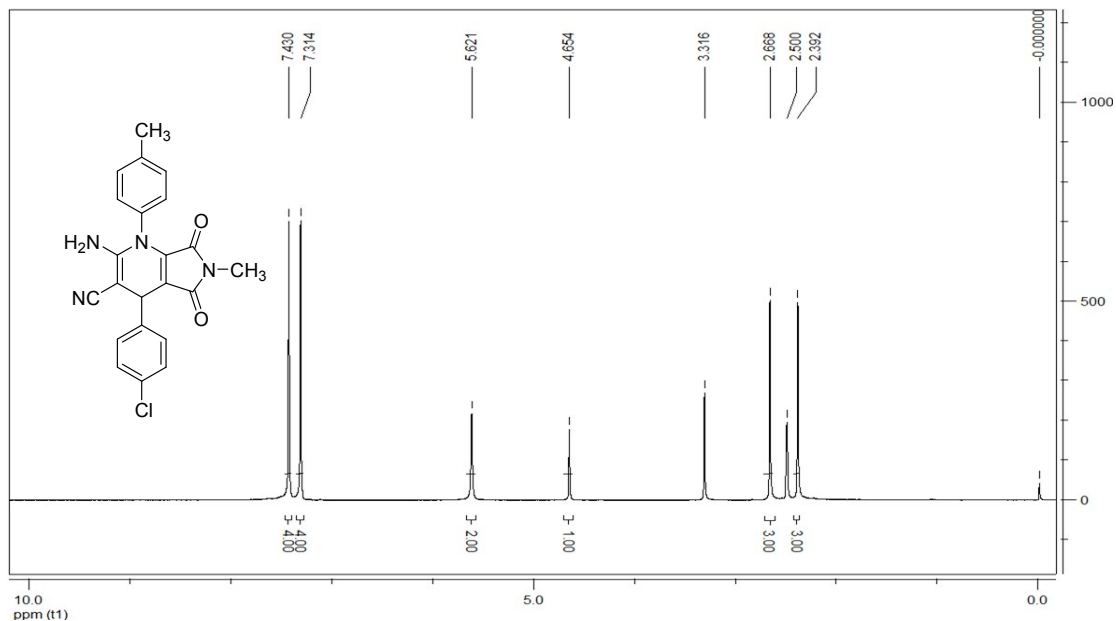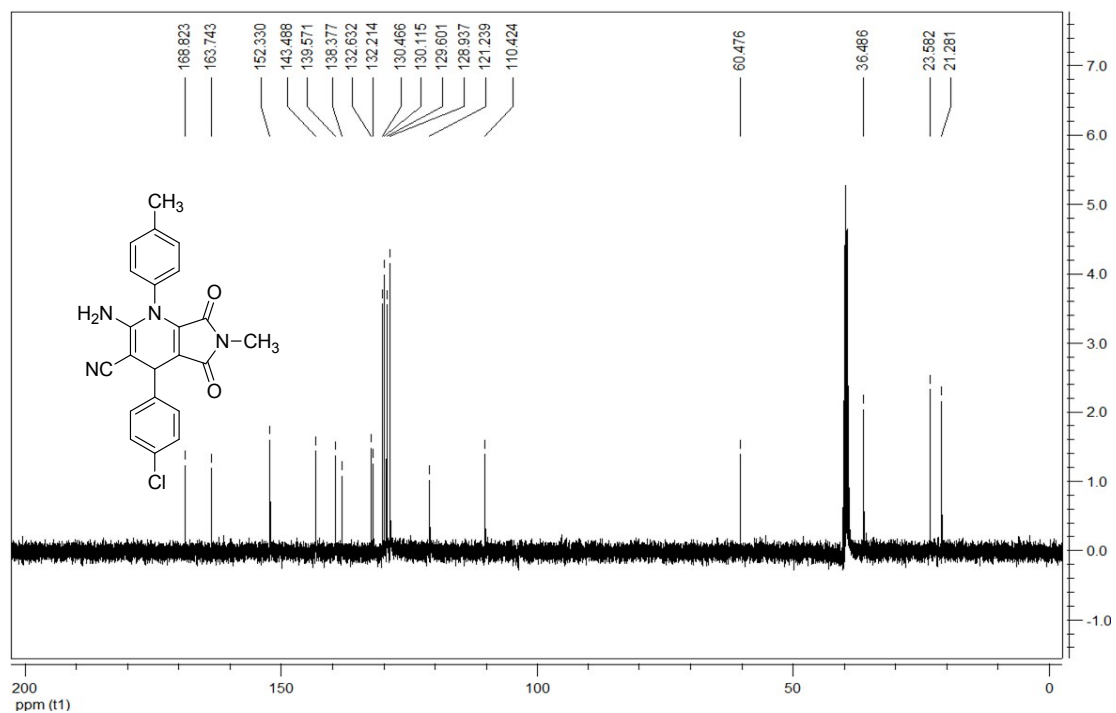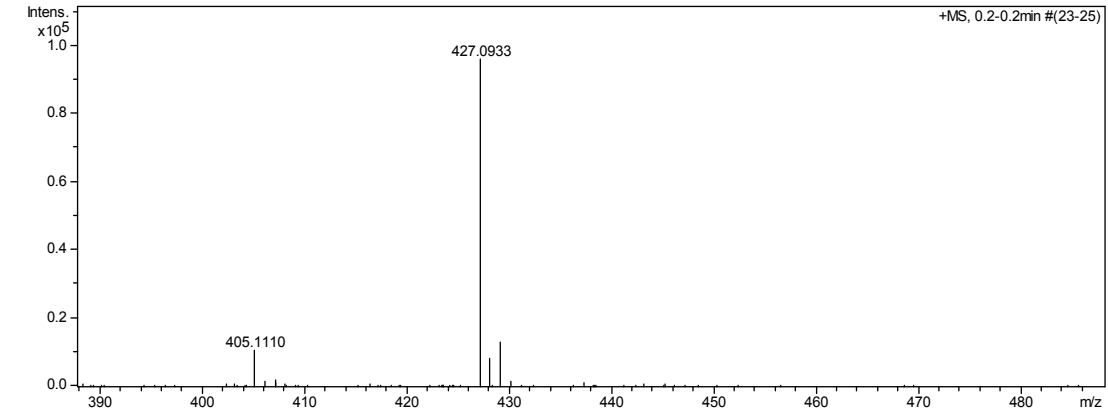

**2-Amino-4-(4-bromophenyl)-6-methyl-5,7-dioxo-1-(*p*-tolyl)-4,5,6,7-tetrahydro-1*H*-pyrrolo[3,4-*b*]pyridine-3-carbonitrile (1f):**

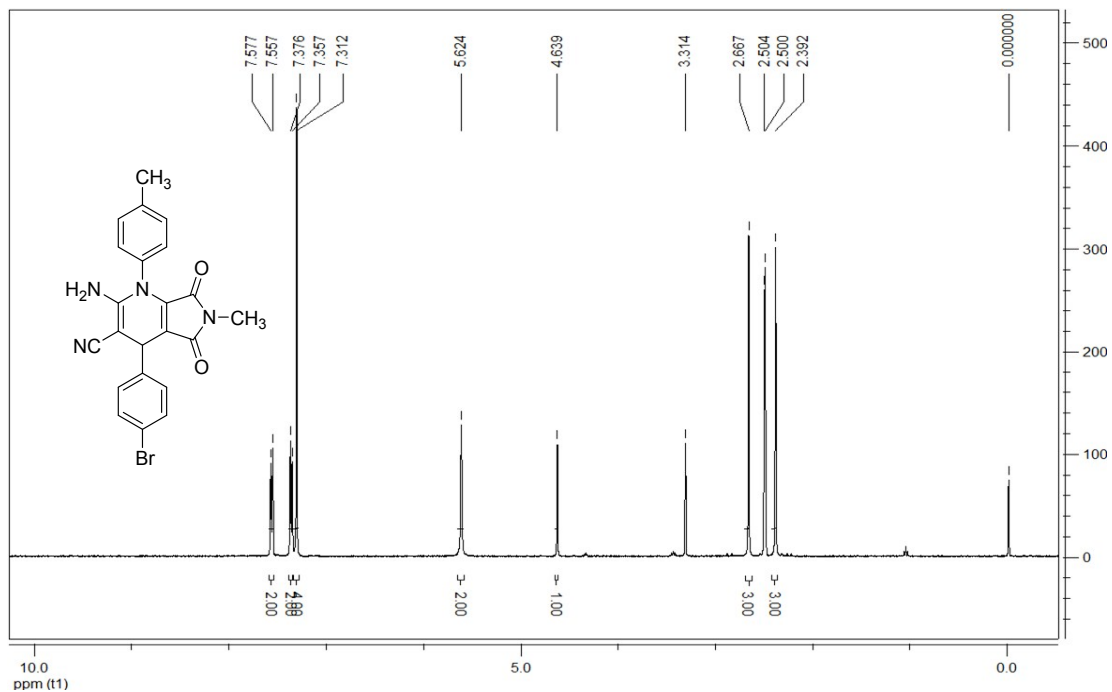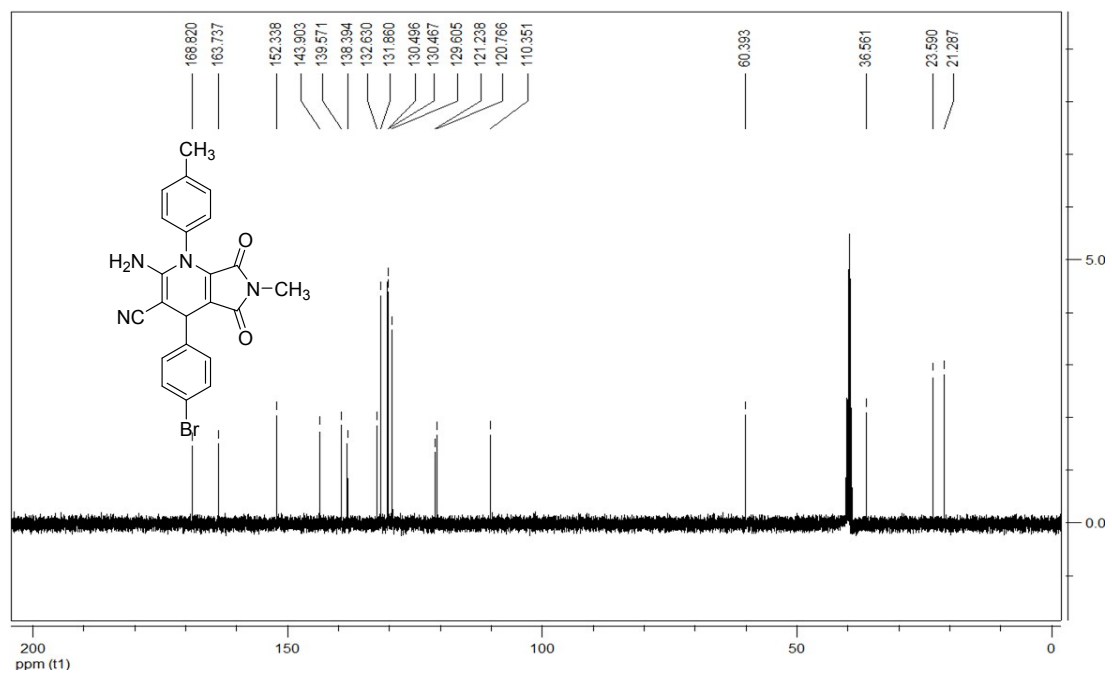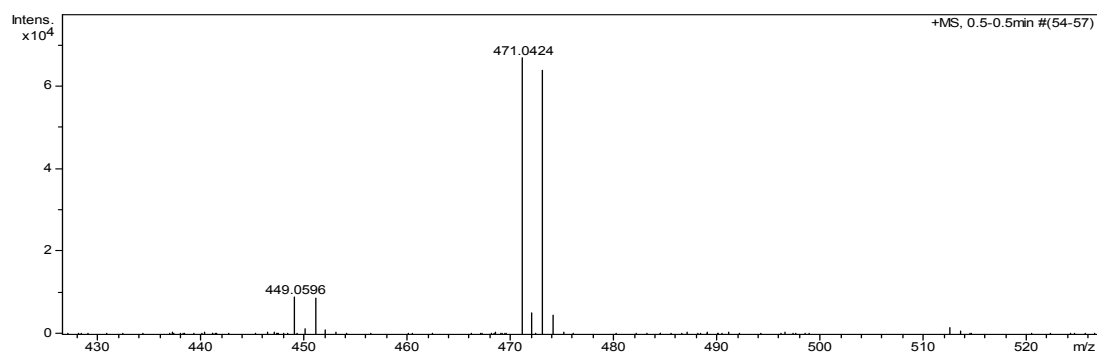



**2-Amino-1-(4-chlorophenyl)-6-methyl-5,7-dioxo-4-phenyl-4,5,6,7-tetrahydro-1H-**

**pyrrolo[3,4-*b*]pyridine-3-carbonitrile (1g):** Yellow solid, 72%, m.p. 240~242 °C; <sup>1</sup>H NMR (400 MHz, DMSO-*d*<sub>6</sub>) δ: 7.56 (d, *J* = 8.8 Hz, 2H, ArH), 7.48 (d, *J* = 8.8 Hz, 2H, ArH), 7.40-7.35 (m, 4H, ArH), 7.29-7.25 (m, 1H, ArH), 5.79 (s, 2H, NH<sub>2</sub>), 4.59 (s, 1H, CH), 2.67 (s, 3H CH<sub>3</sub>); <sup>13</sup>C NMR (100 MHz, DMSO-*d*<sub>6</sub>) δ: 168.9, 163.9, 152.0, 144.5, 138.0, 134.6, 134.3, 132.4, 131.8, 130.2, 129.6, 128.7, 128.5, 121.4, 110.0, 60.8, 37.0, 23.9, 23.3; IR (KBr) ν: 3452, 3098, 2941, 2876, 2184, 1771, 1716, 1676, 1626, 1559, 1489, 1417, 1379, 1280, 1181, 1079, 980, 839, 758 cm<sup>-1</sup>; MS (*m/z*): HRMS (ESI) Calcd. for C<sub>21</sub>H<sub>15</sub>ClN<sub>4</sub>NaO<sub>2</sub> ([M+Na]<sup>+</sup>): 413.0776. Found: 413.0779.

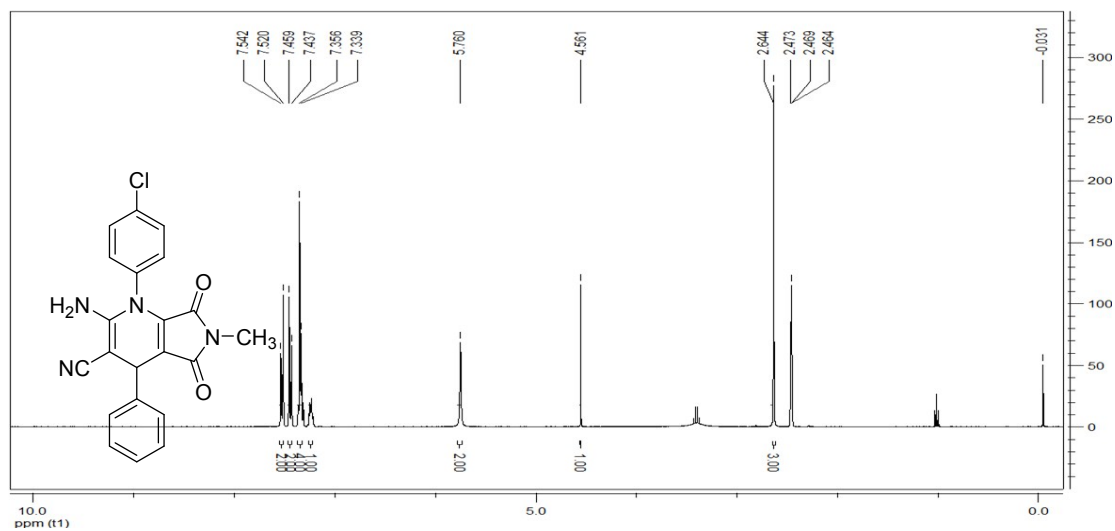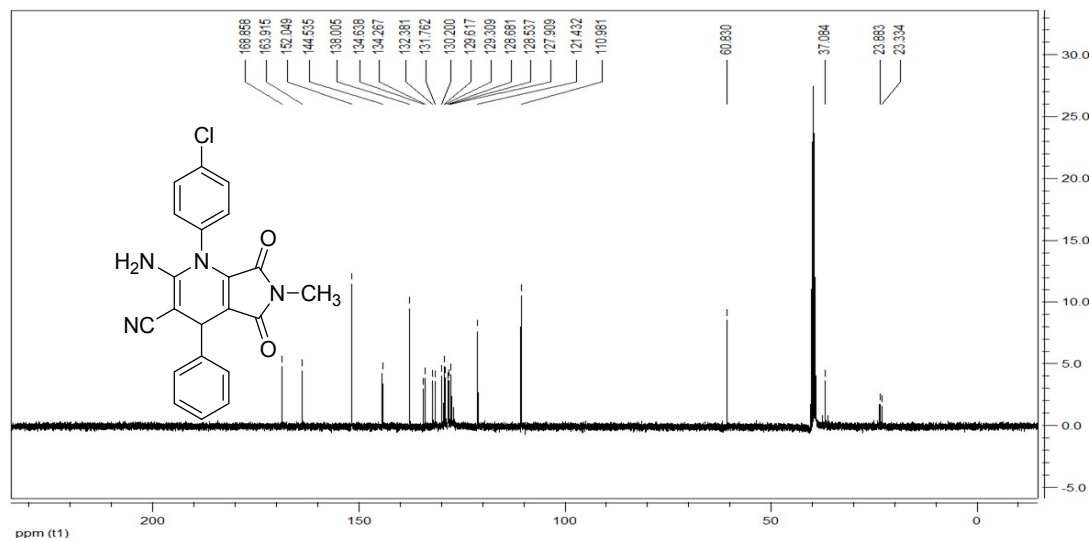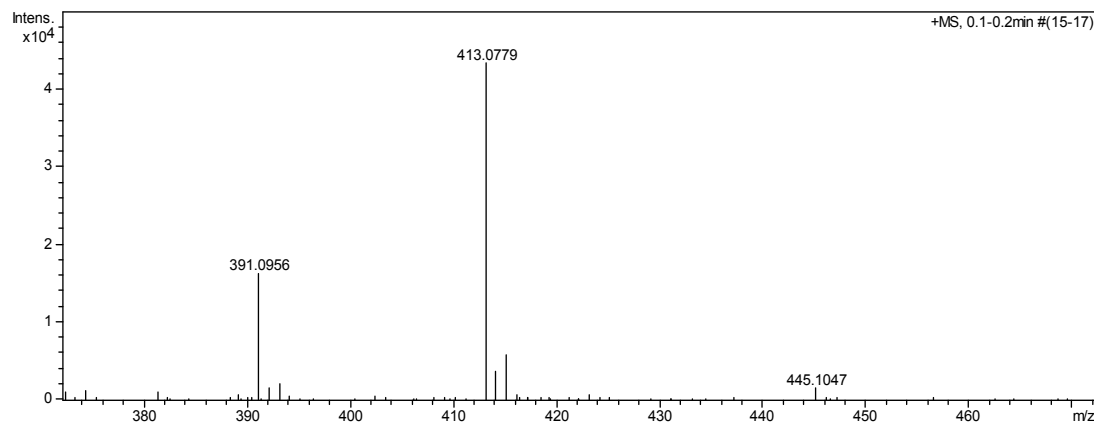

**2-Amino-1,4-bis(4-chlorophenyl)-6-methyl-5,7-dioxo-4,5,6,7-tetrahydro-1H-pyrrolo[3,4-b]pyridine-3-carbonitrile (1h):**

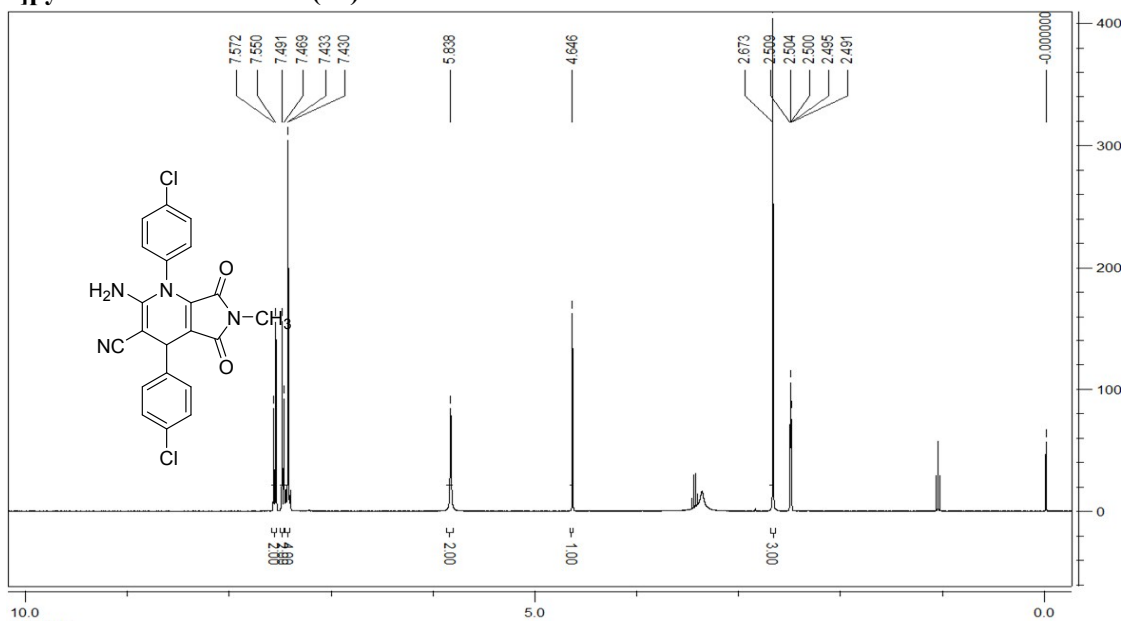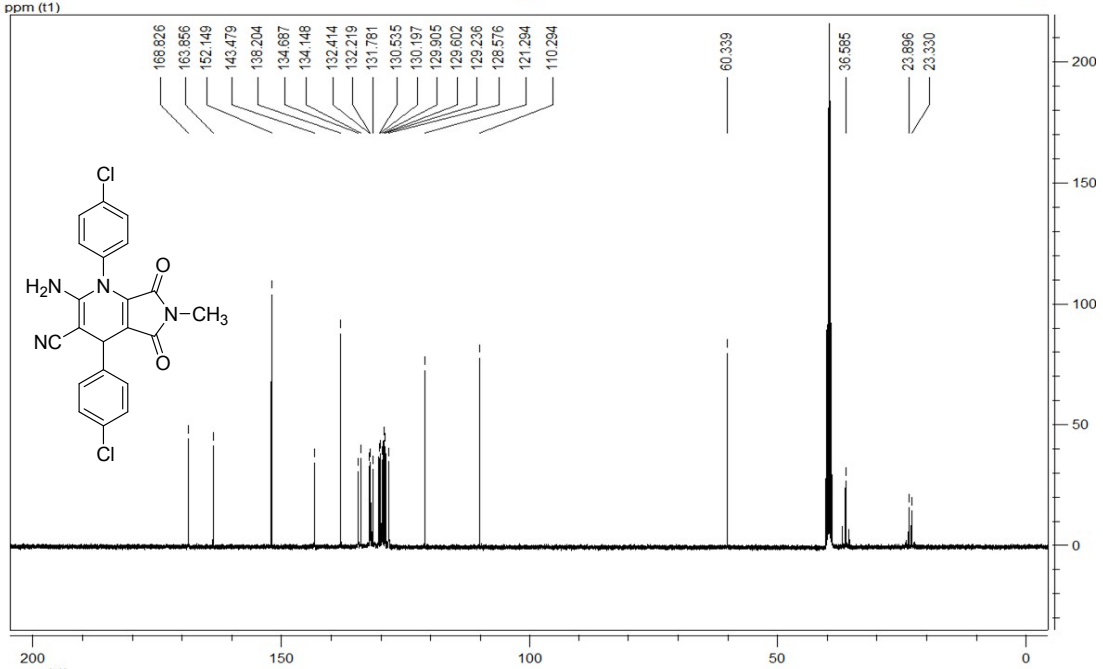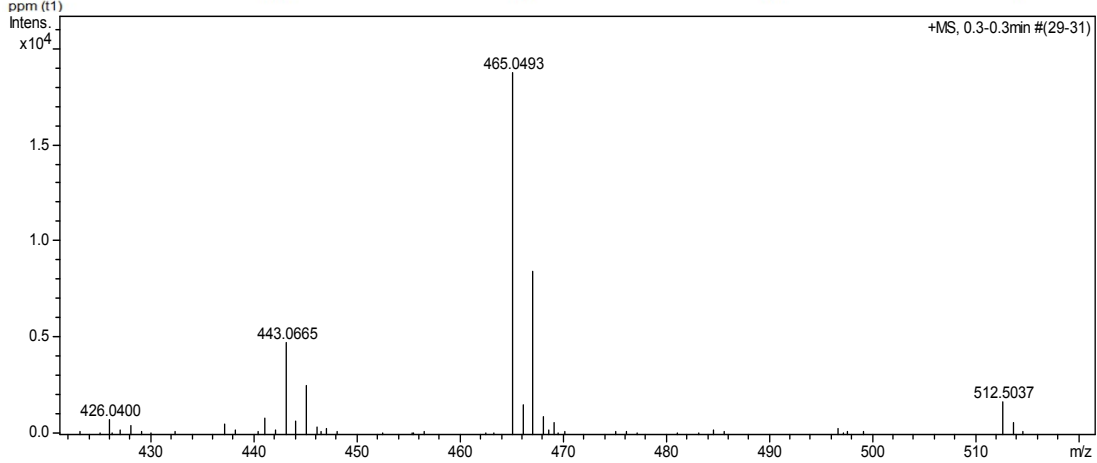

**2-Amino-1-(4-bromophenyl)-6-methyl-5,7-dioxo-4-phenyl-4,5,6,7-tetrahydro-1H-pyrrolo[3,4-b]pyridine-3-carbonitrile (1i):**

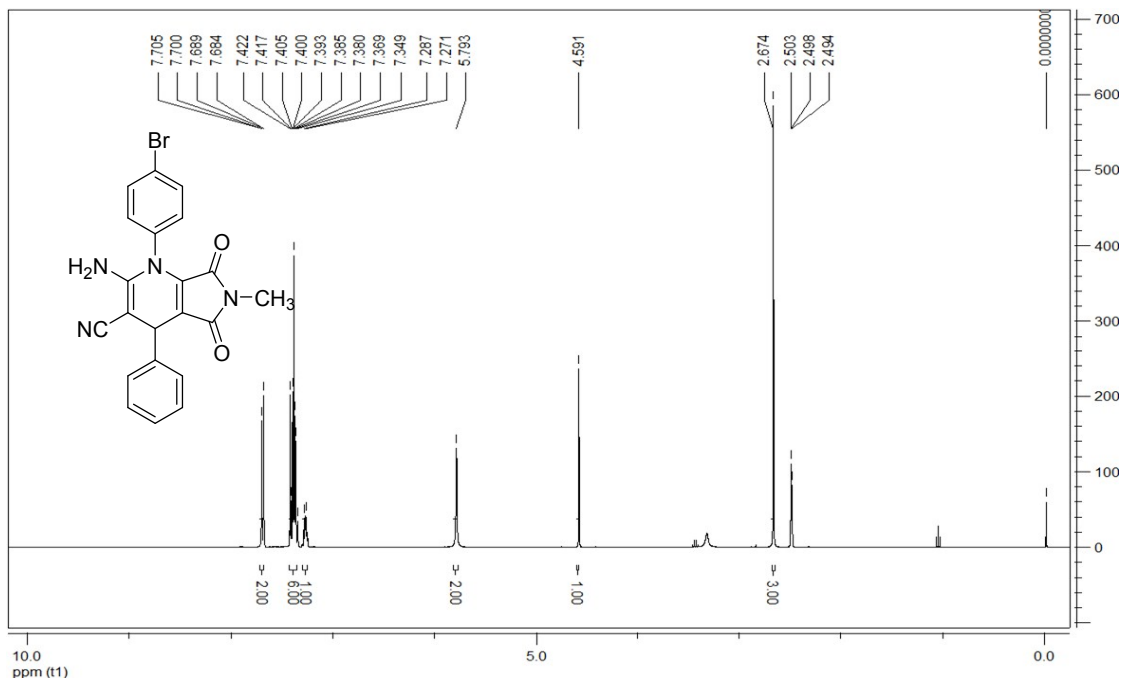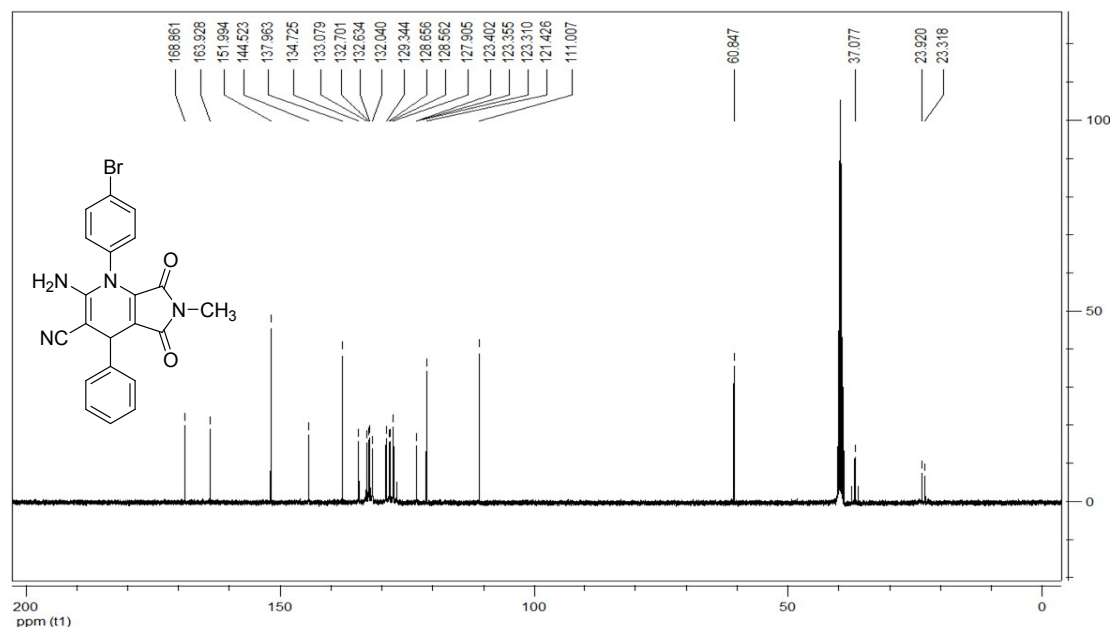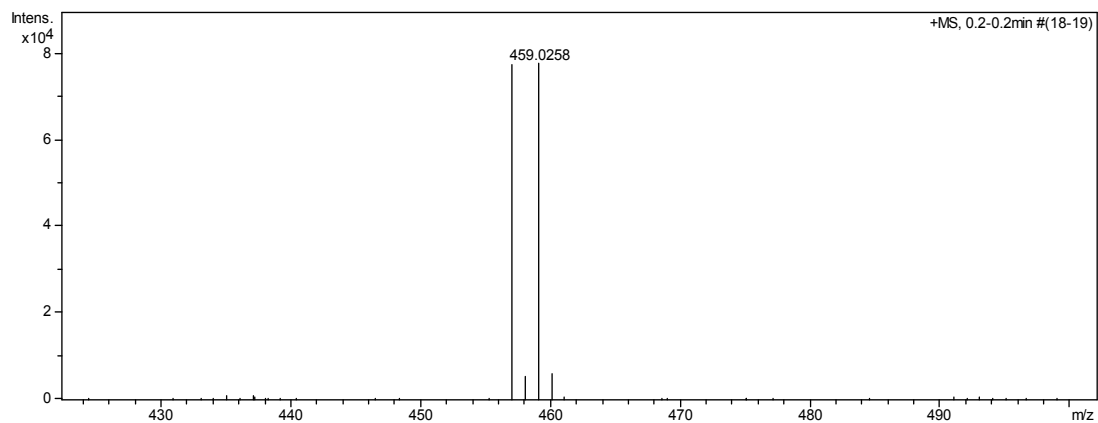

**2-Amino-1-(4-bromophenyl)-4-(4-chlorophenyl)-6-methyl-5,7-dioxo-4,5,6,7-tetrahydro-1H-pyrrolo[3,4-b]pyridine-3-carbonitrile (1j):**

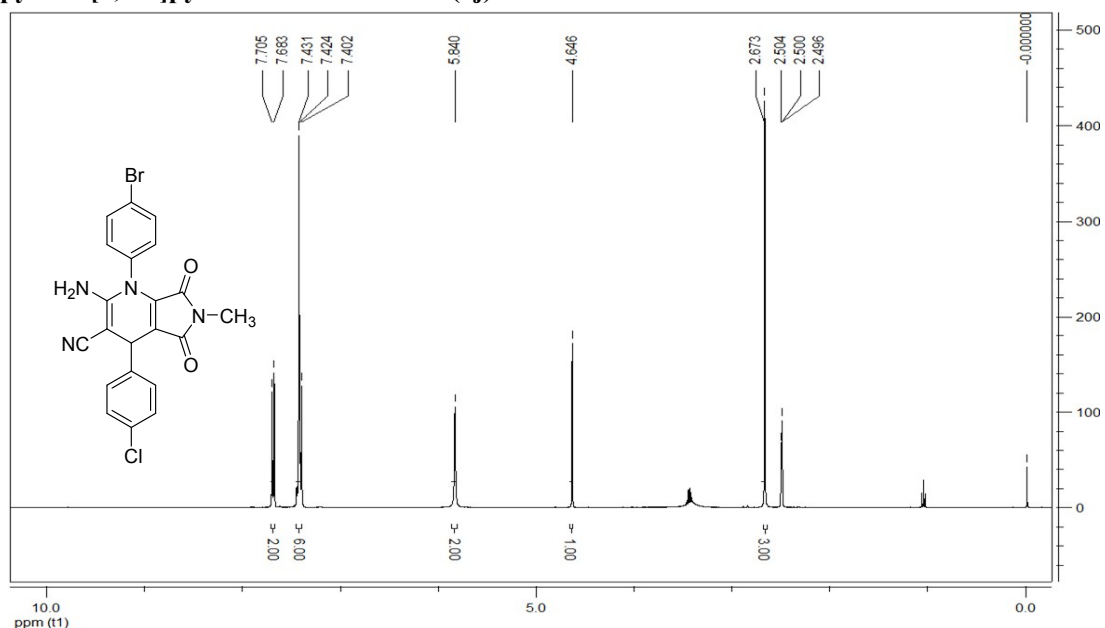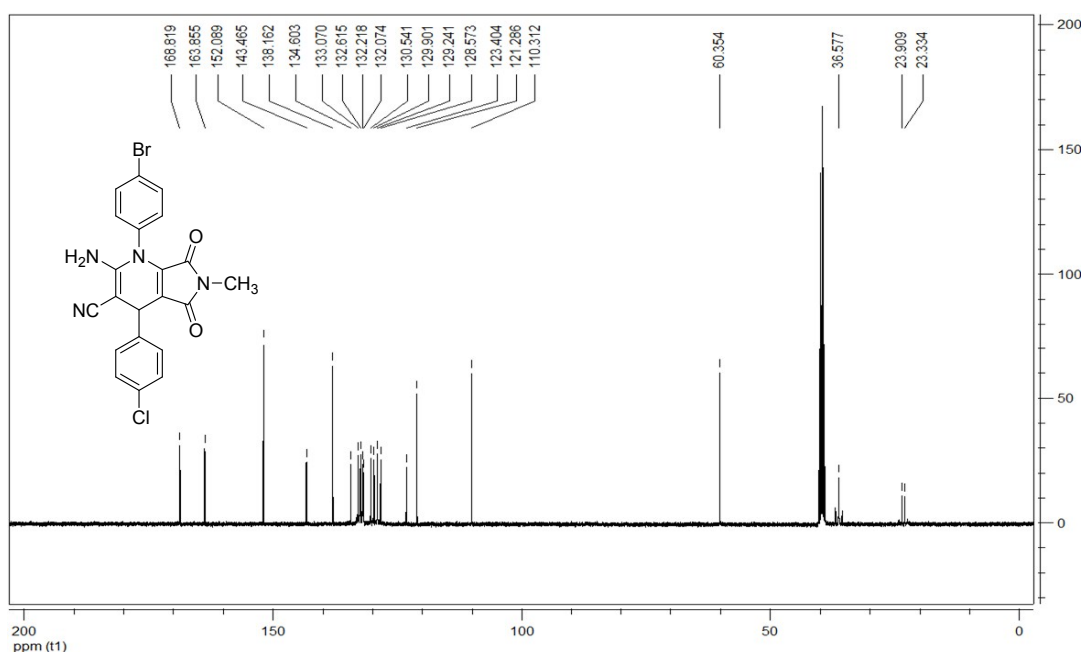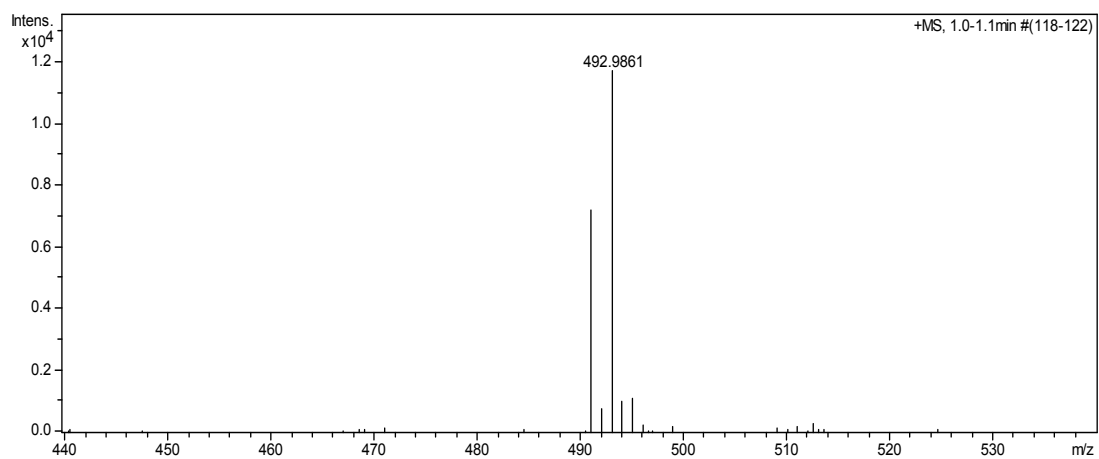

**Ethyl-2-amino-6-methyl-4-(3-nitrophenyl)-5,7-dioxo-1-(*p*-tolyl)-4,5,6,7-tetrahydro-1*H*-pyrrolo[3,4-*b*]pyridine-3-carboxylate (1k):**

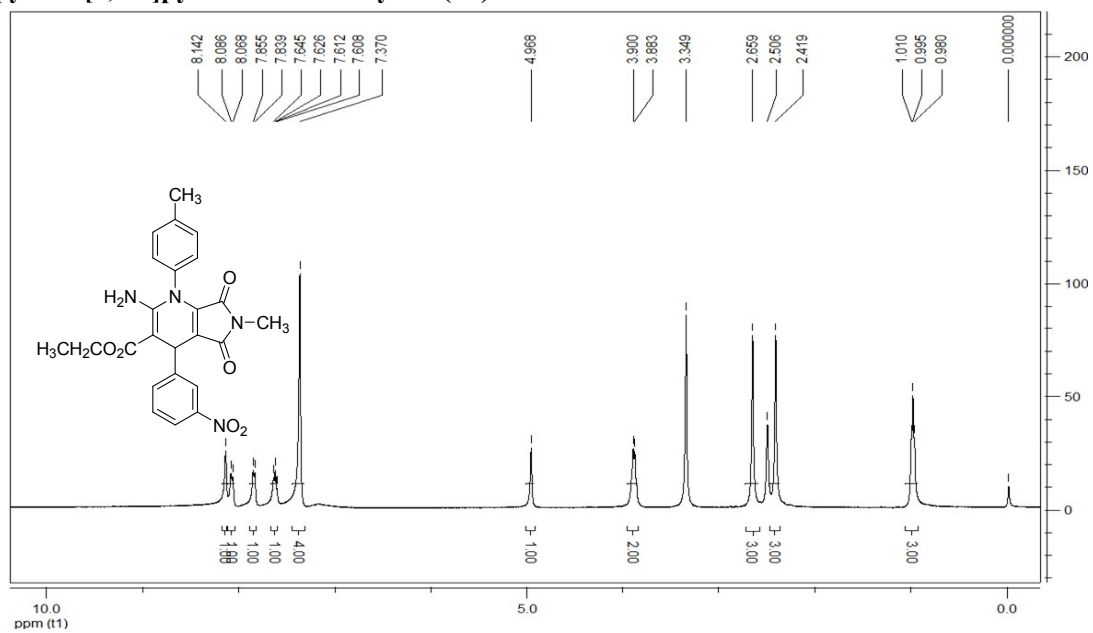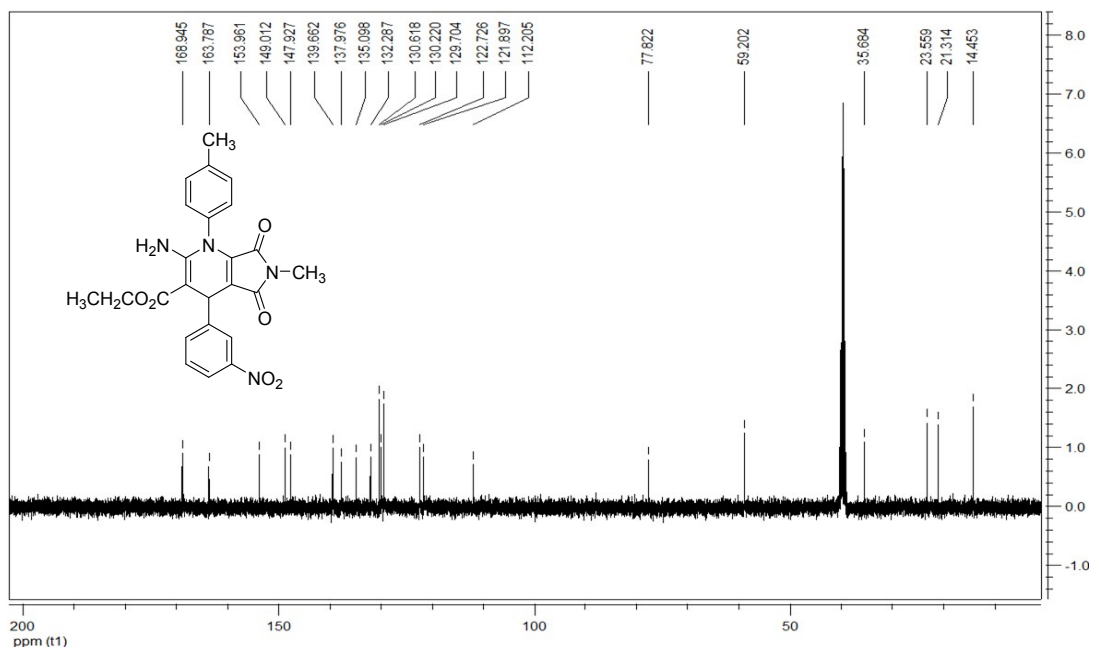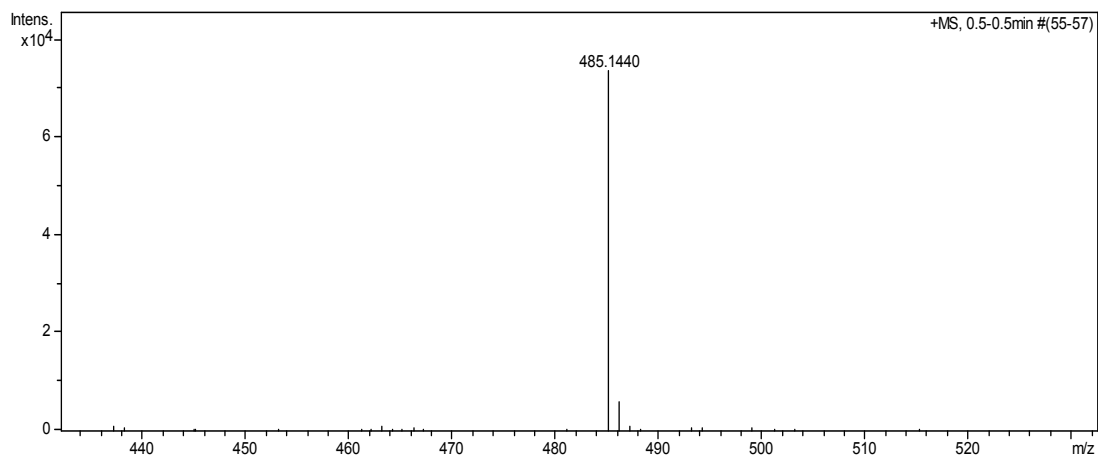

**Ethyl-2-amino-1-(4-chlorophenyl)-6-methyl-4-(3-nitrophenyl)-5,7-dioxo-4,5,6,7-tetrahydro-1H-pyrrolo[3,4-b]pyridine-3-carboxylate (11):**

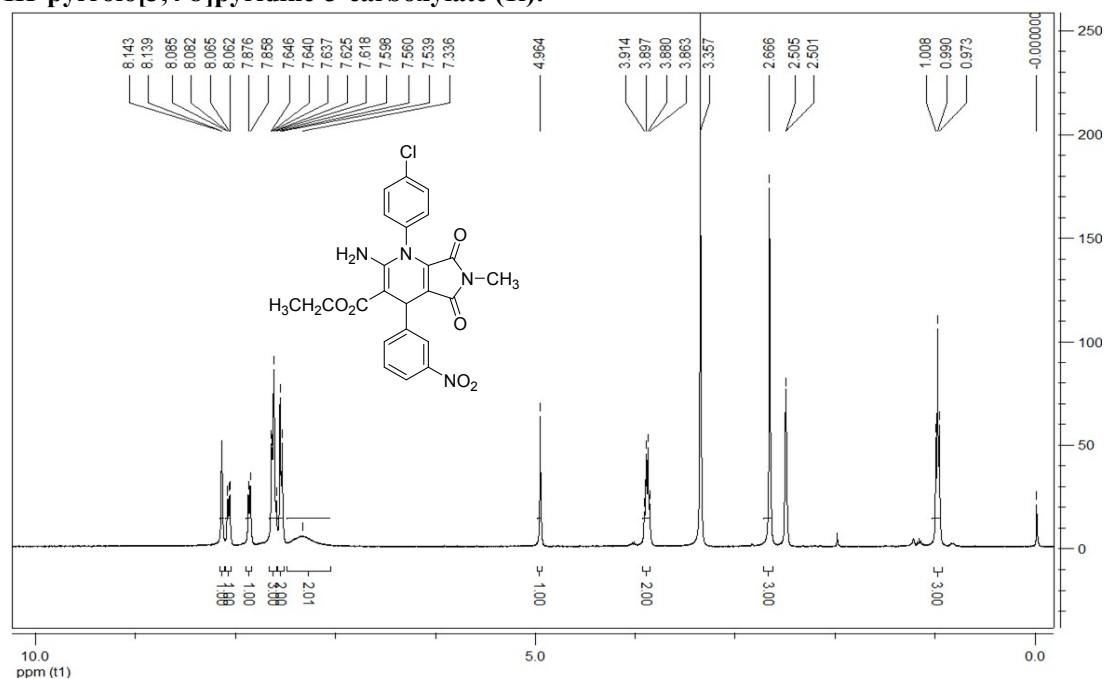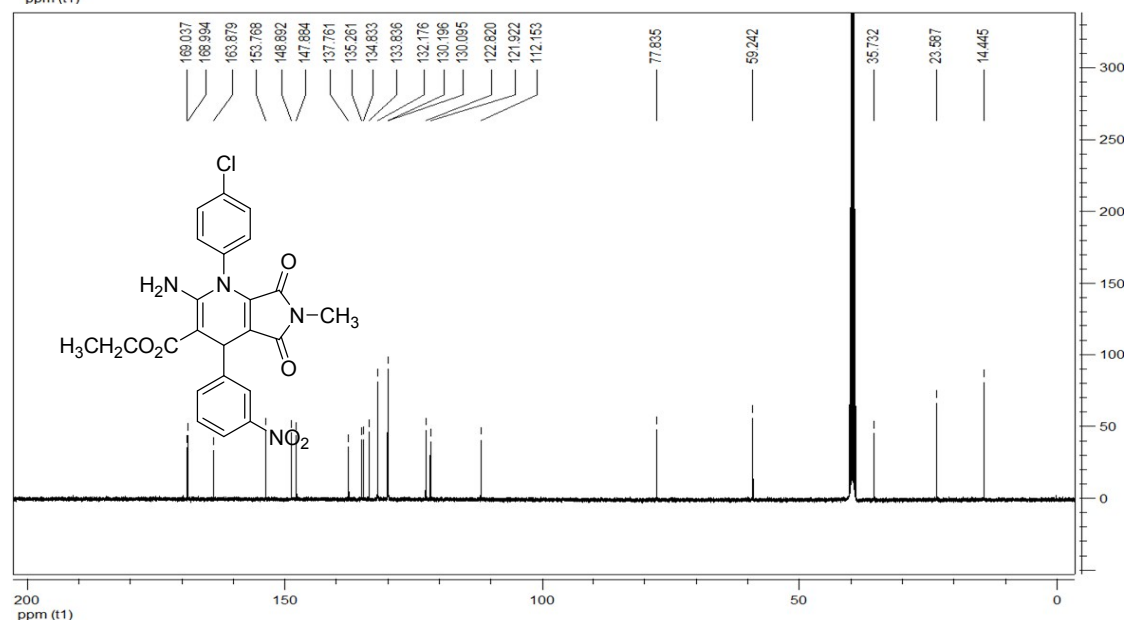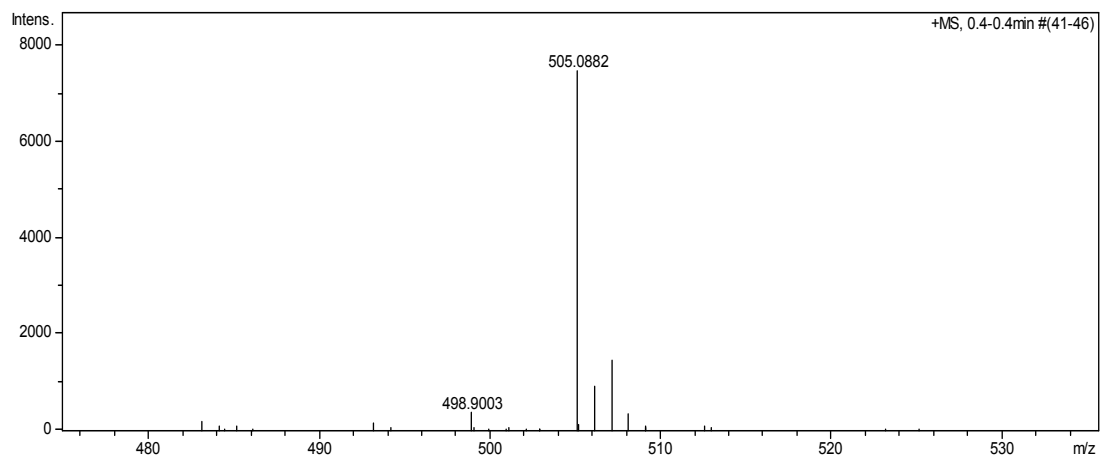

**Ethyl-2-amino-1-(4-bromophenyl)-6-methyl-4-(3-nitrophenyl)-5,7-dioxo-4,5,6,7-tetrahydro-1H-pyrrolo[3,4-b]pyridine-3-carboxylate (1m):**

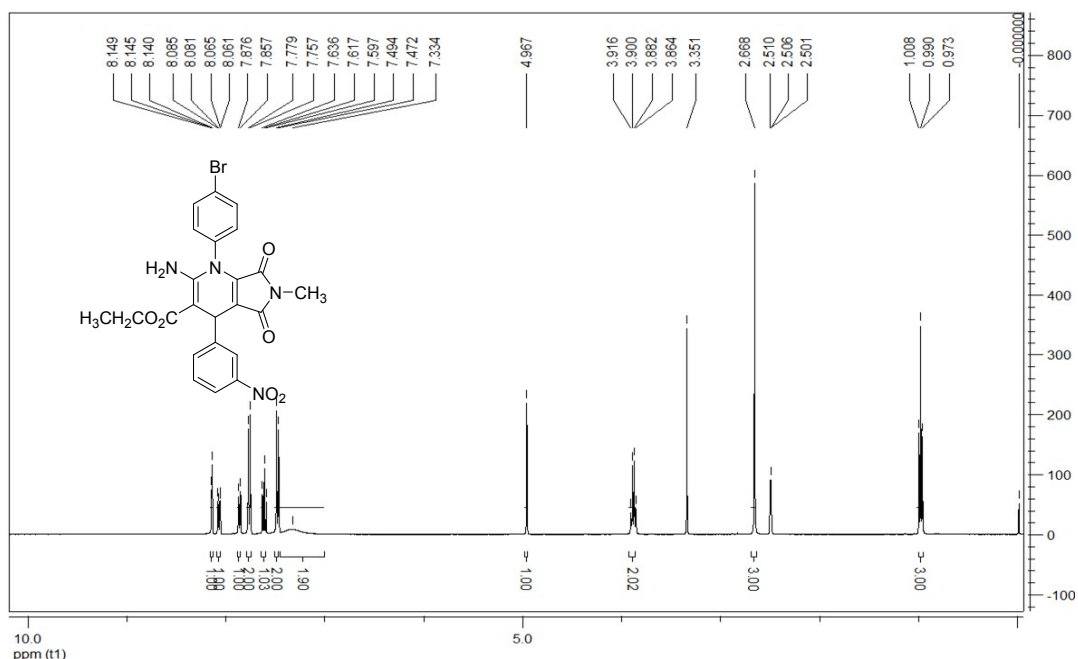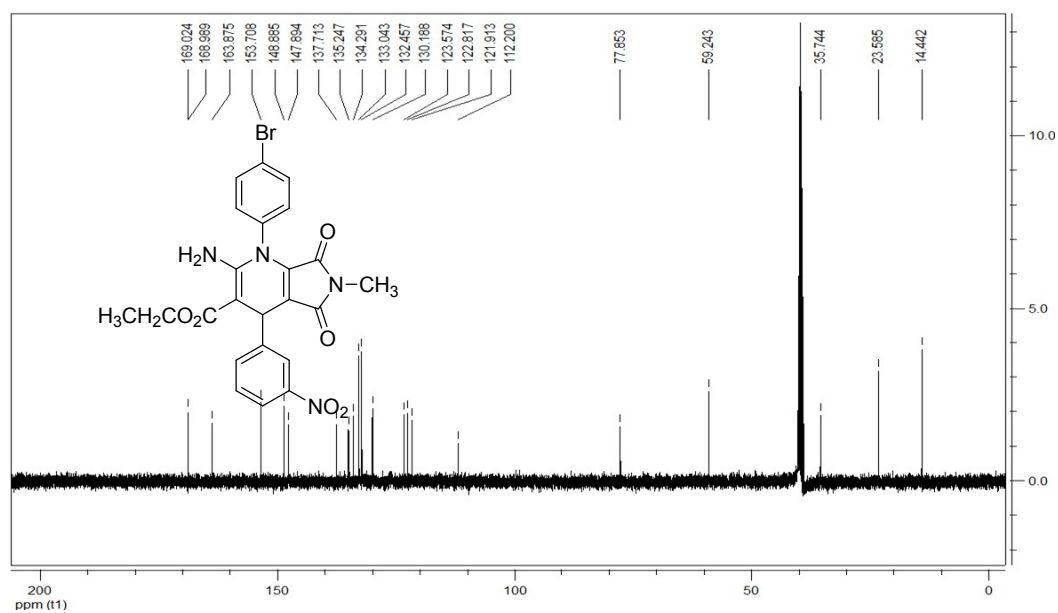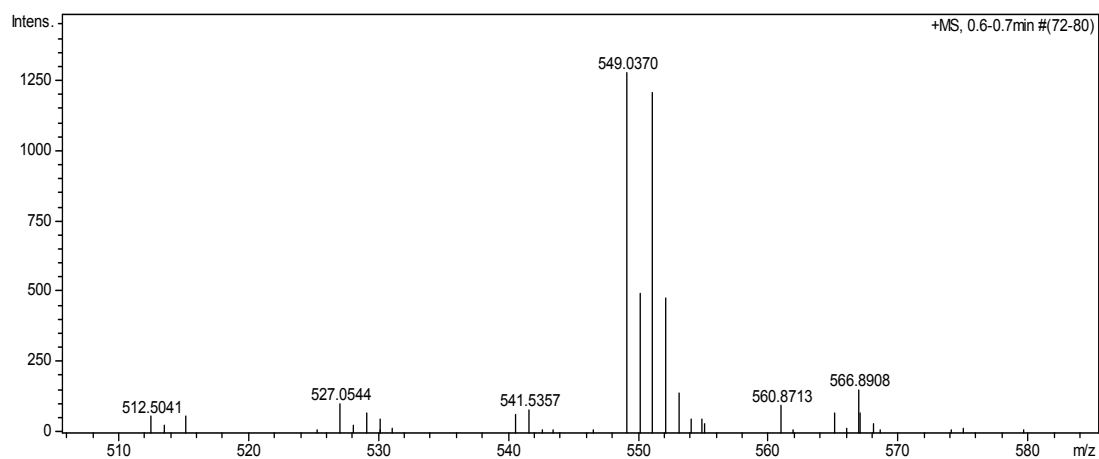

**2-Amino-1-benzyl-6-methyl-5,7-dioxo-4-phenyl-4,5,6,7-tetrahydro-1H-pyrrolo[3,4-b]pyridine-3-carboxamide (1n):**

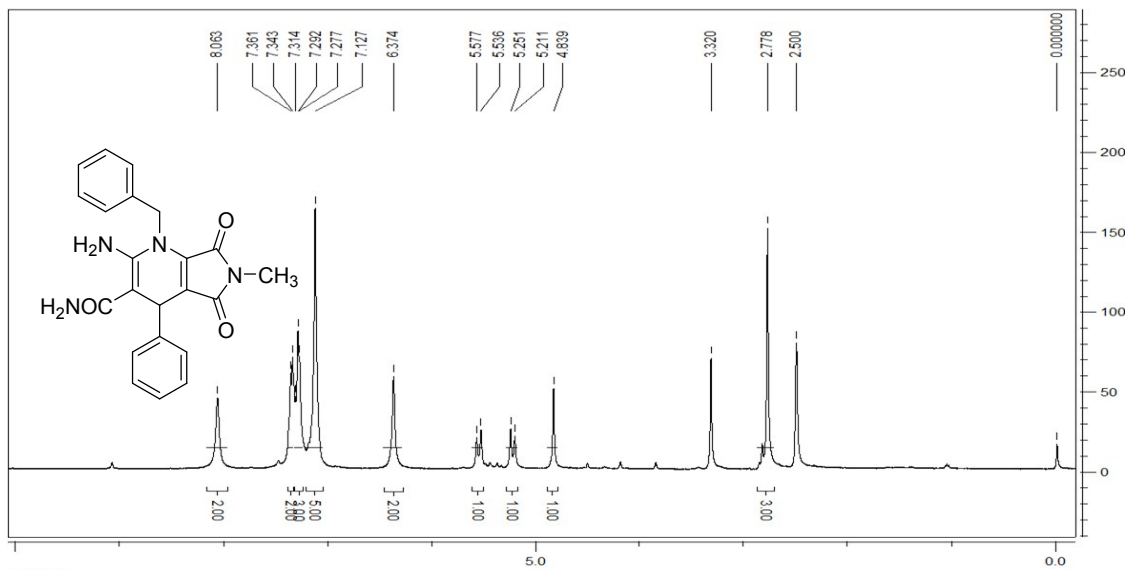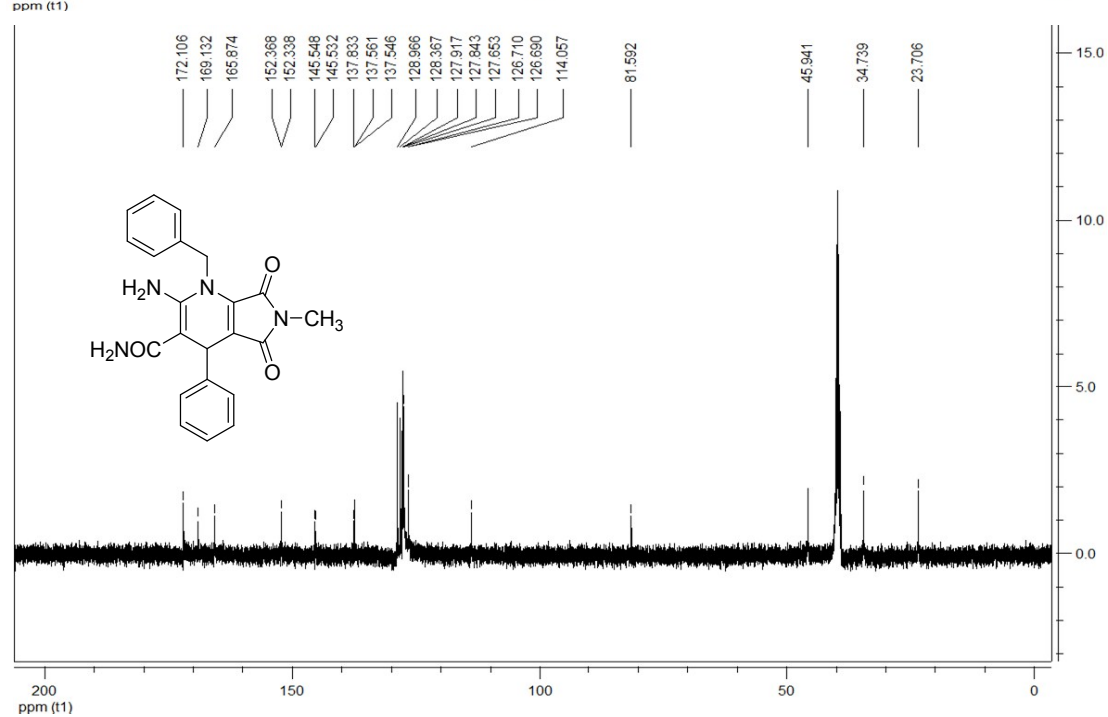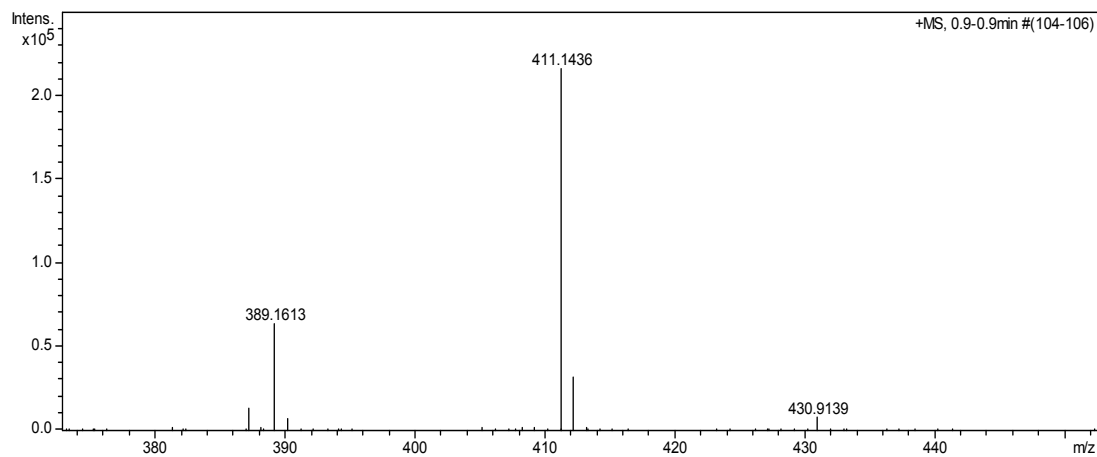



**2-Amino-1-benzyl-4-(4-chlorophenyl)-6-methyl-5,7-dioxo-4,5,6,7-tetrahydro-1H-pyrrolo[3,4-b]pyridine-3-carboxamide (1o):**

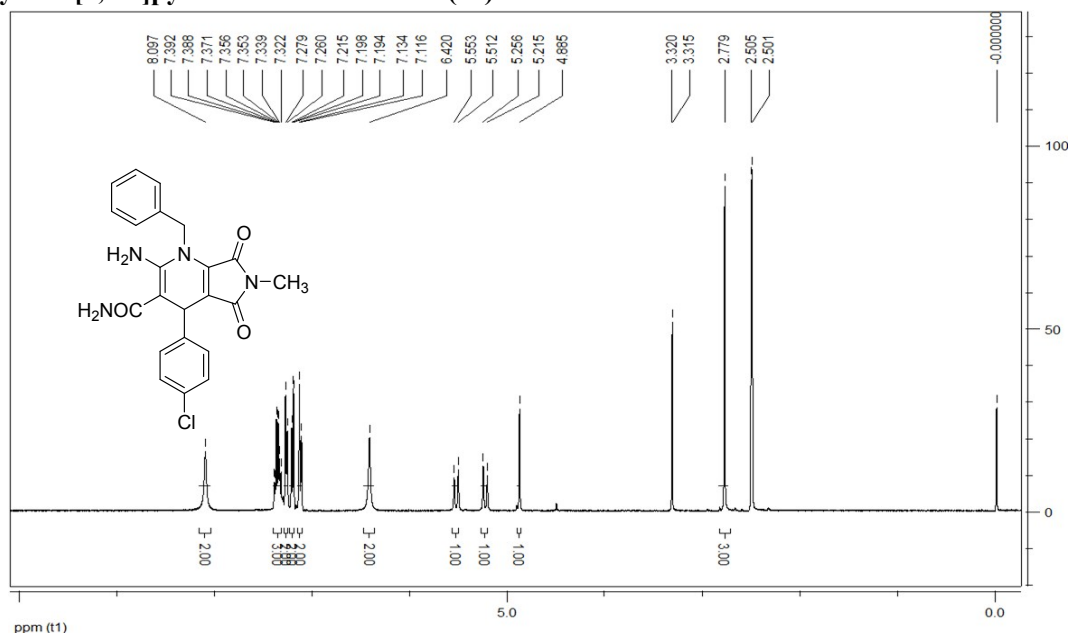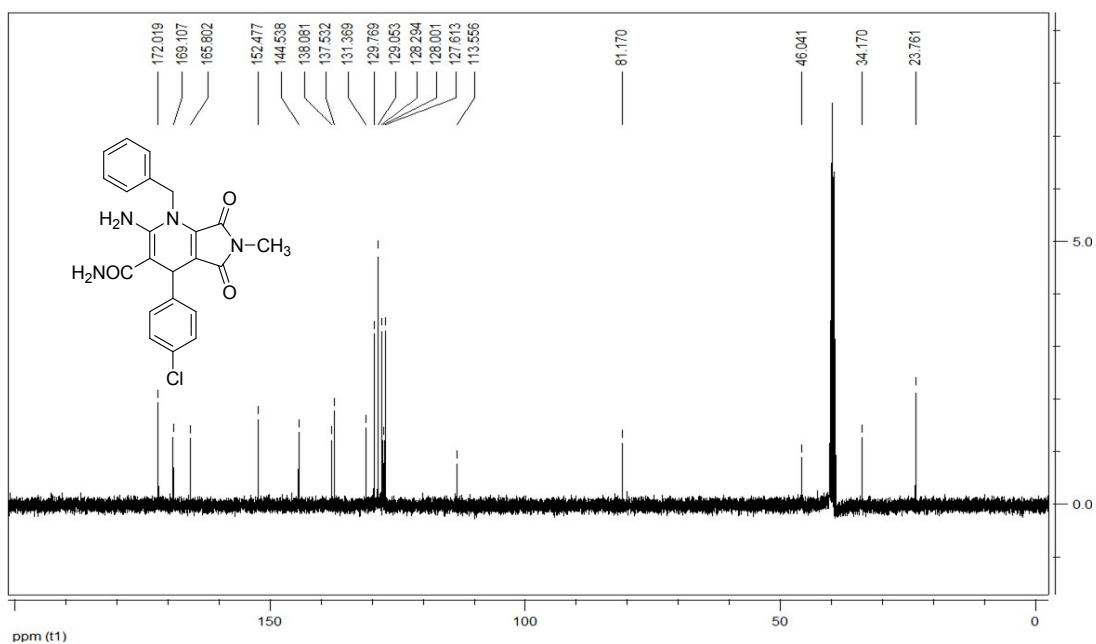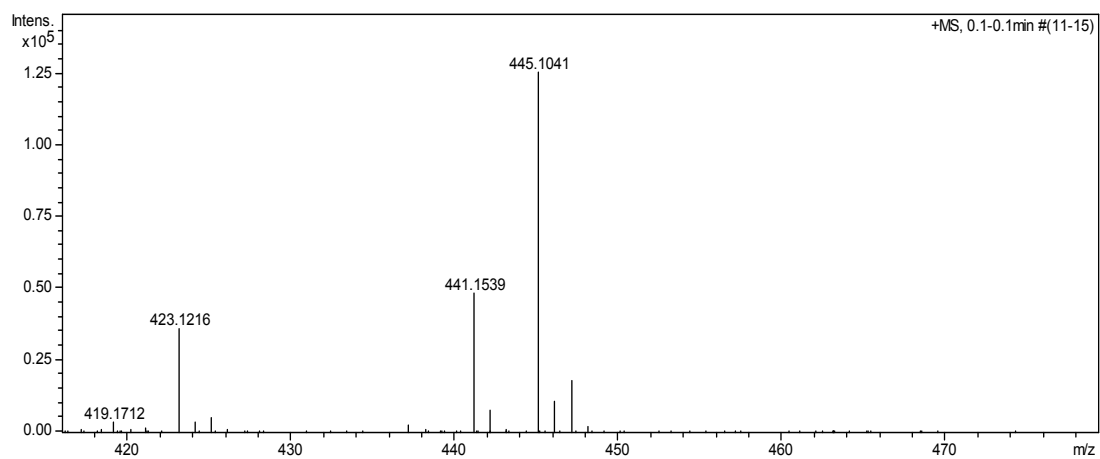

**2-Amino-4-(4-chlorophenyl)-6-methyl-5,7-dioxo-1-(*p*-tolyl)-4,5,6,7-tetrahydro-1*H*-pyrrolo[3,4-*b*]pyridine-3-carboxamide (1p):**

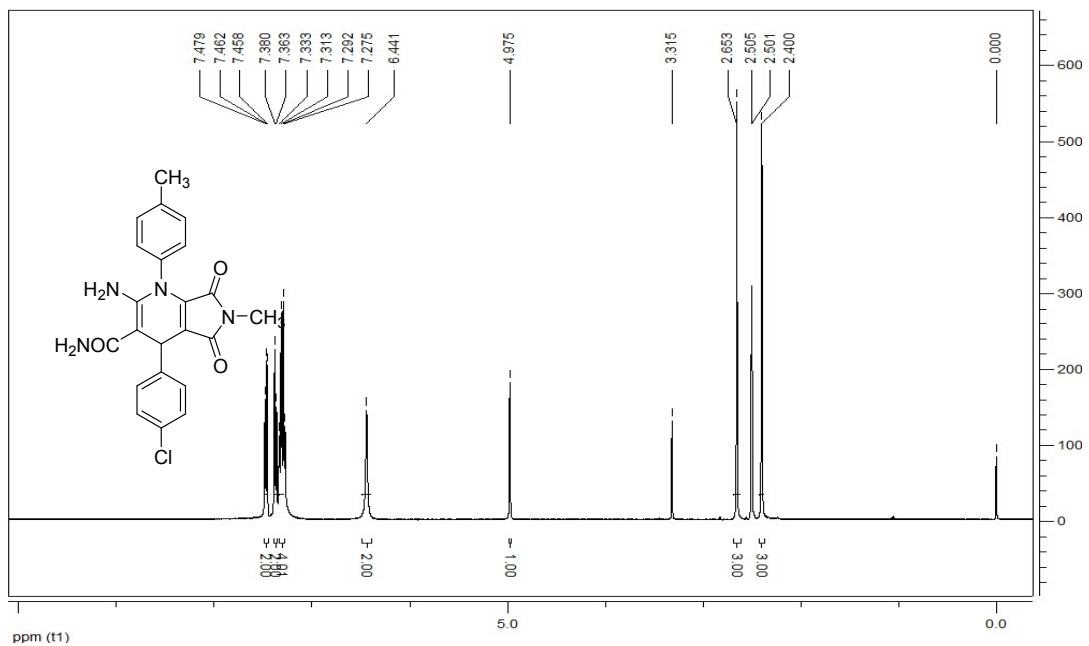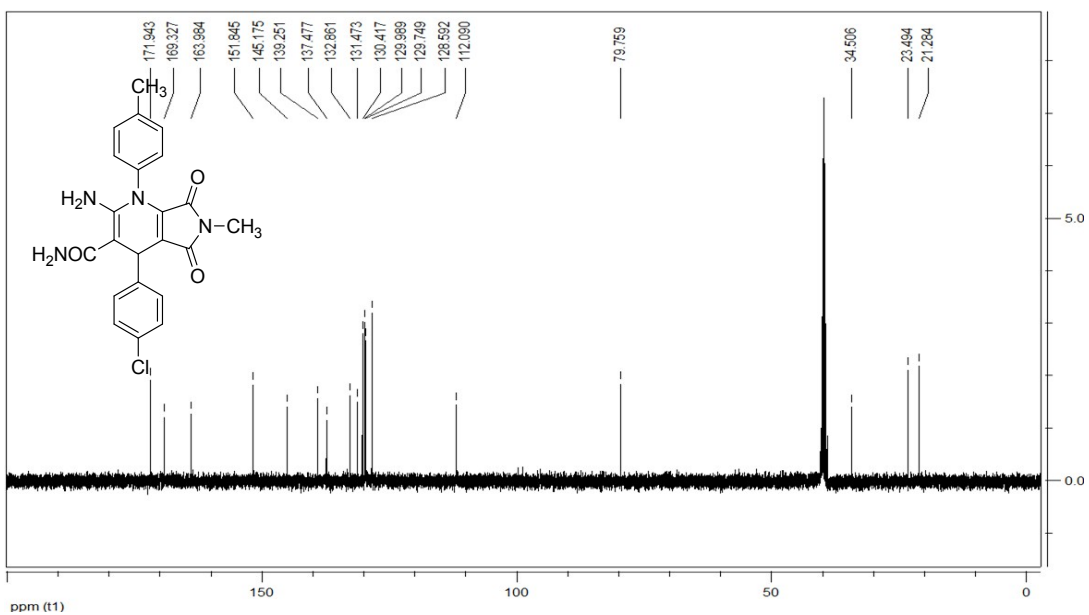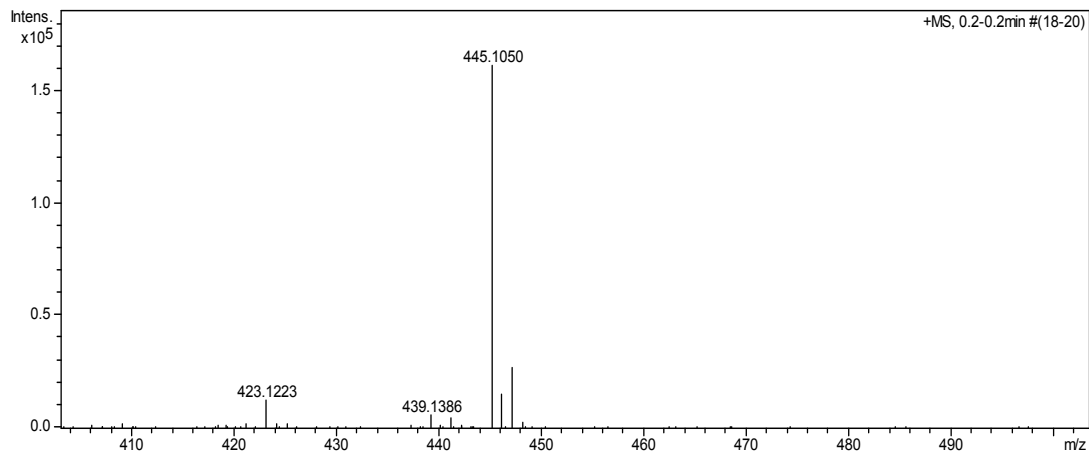

**2-Methyl-9-phenyl-4-(*p*-tolyl)-6,7,8,9-tetrahydro-1*H*-pyrrolo[3,4-*b*]quinoline-1,3,5(2*H*,4*H*)-trione (3a):**

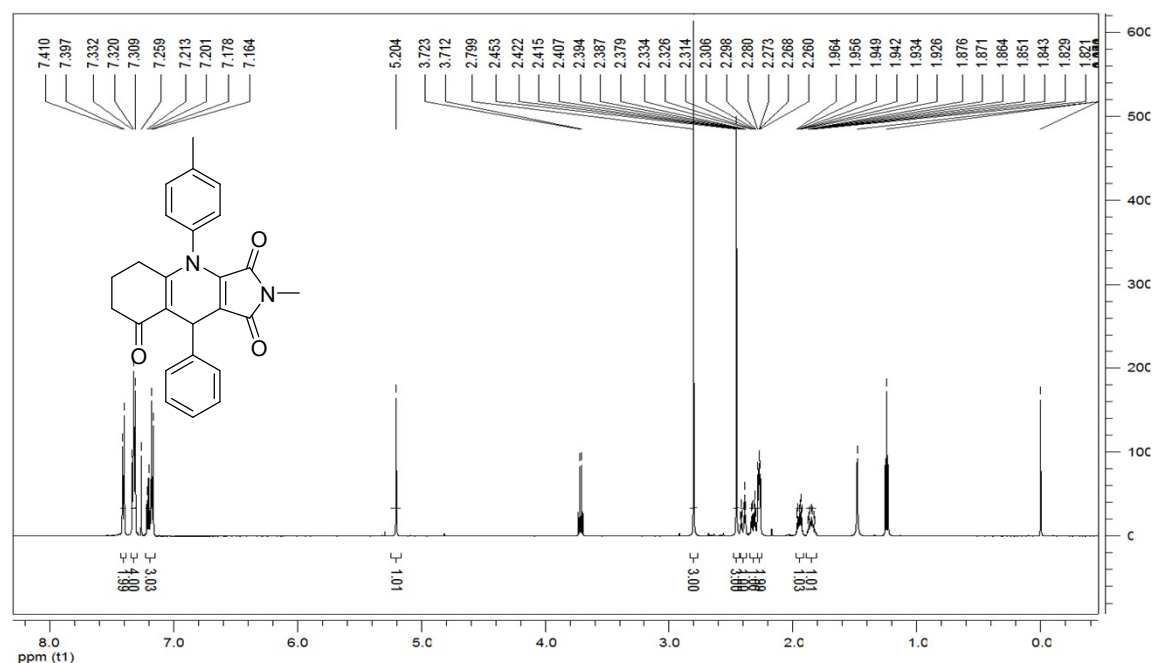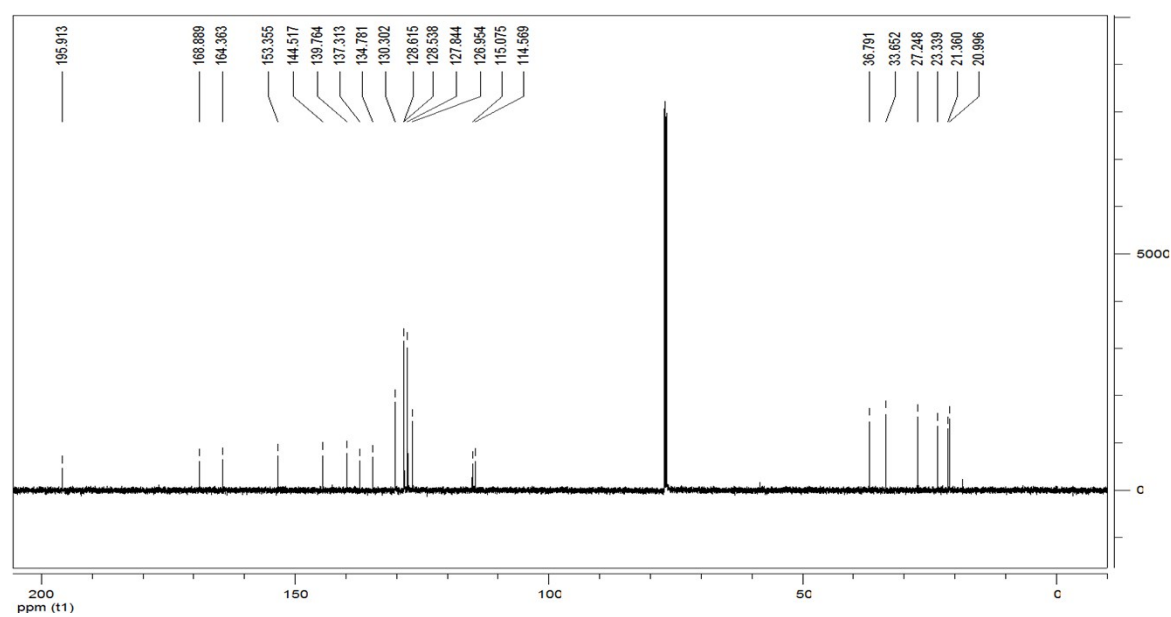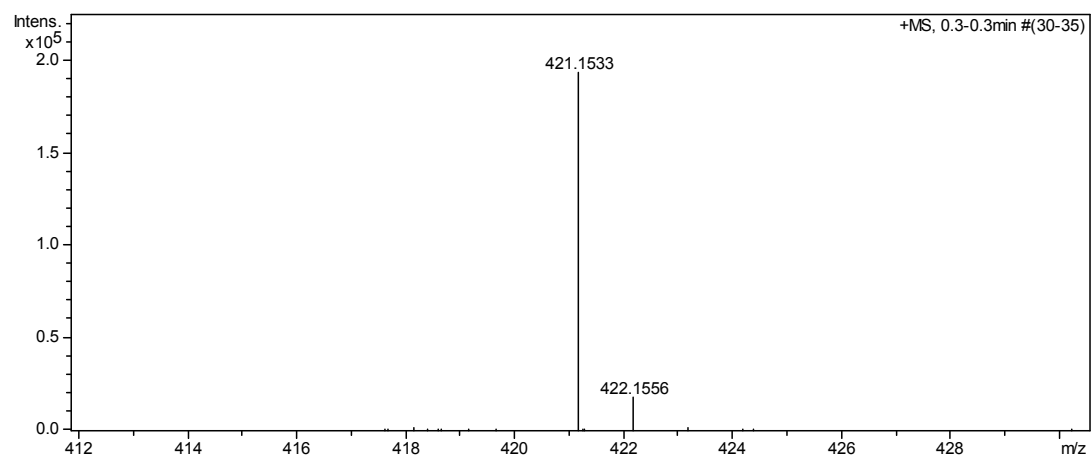

**2,7,7-Trimethyl-4,9-di-p-tolyl-6,7,8,9-tetrahydro-1H-pyrrolo[3,4-b]quinoline-1,3,5(2H,4H)-trione (3b):**

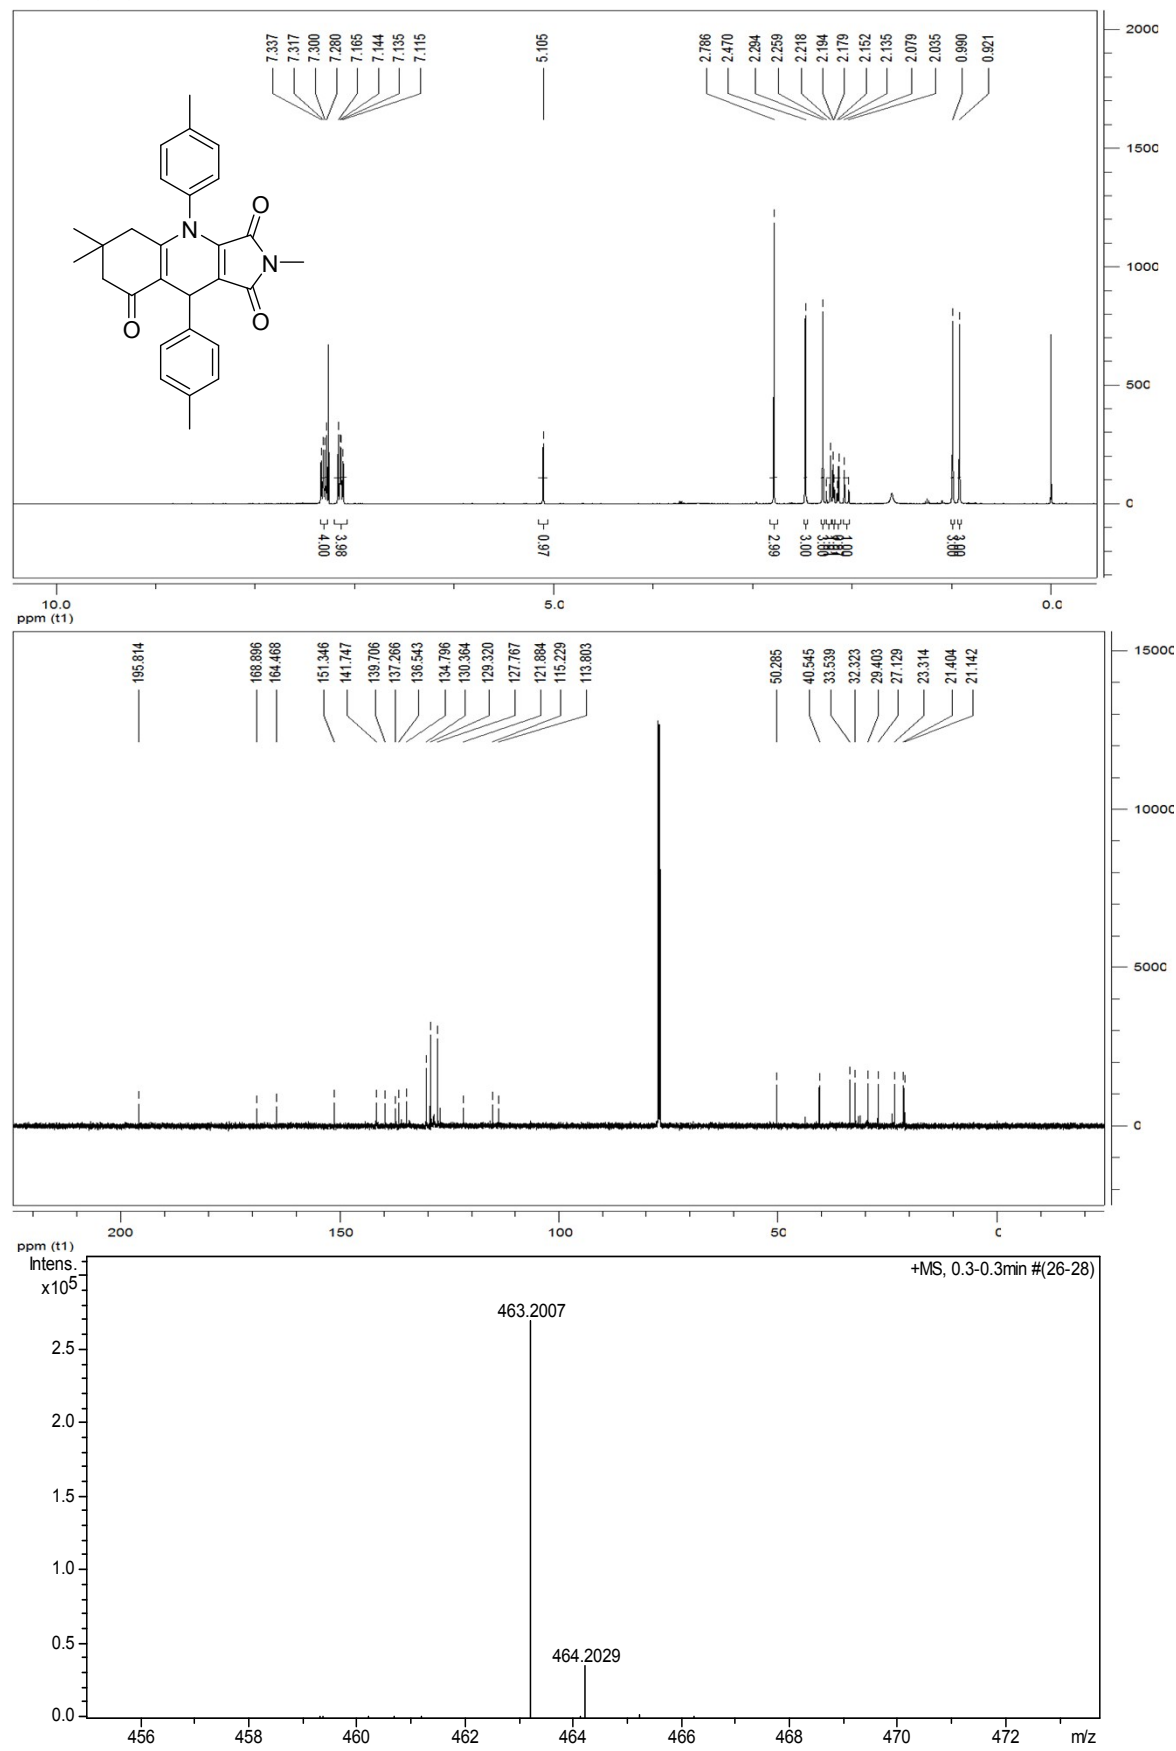

**9-(4-(tert-Butyl)phenyl)-2,7,7-trimethyl-4-(p-tolyl)-6,7,8,9-tetrahydro-1H-pyrrolo[3,4-b]quinoline-1,3,5(2H,4H)-trione (3c):**

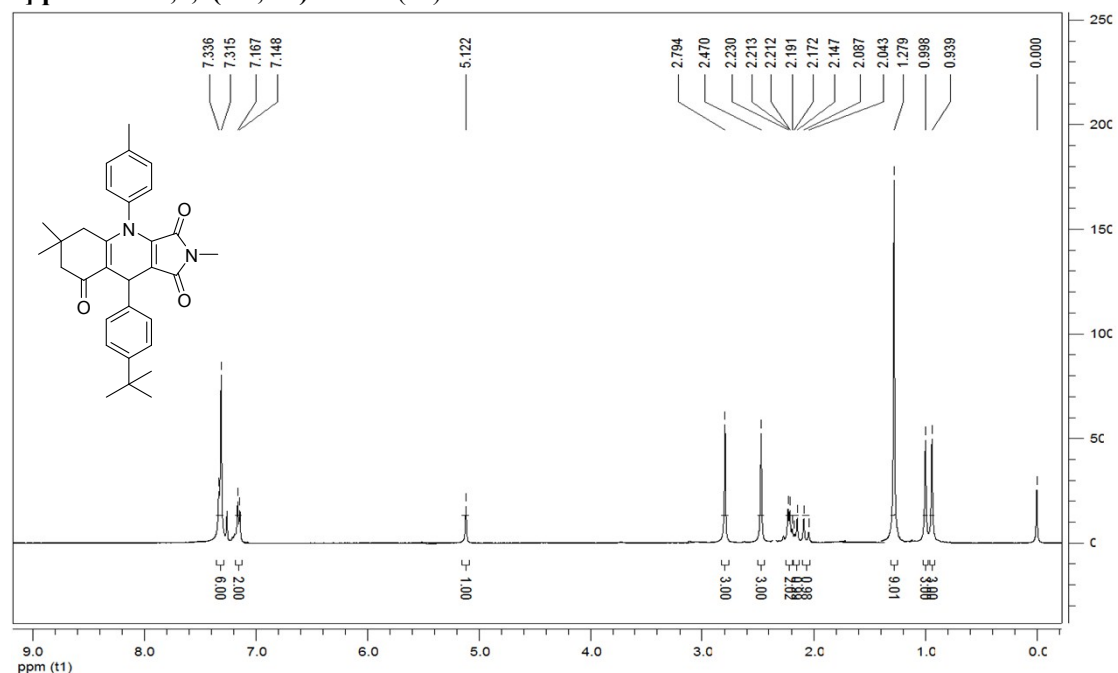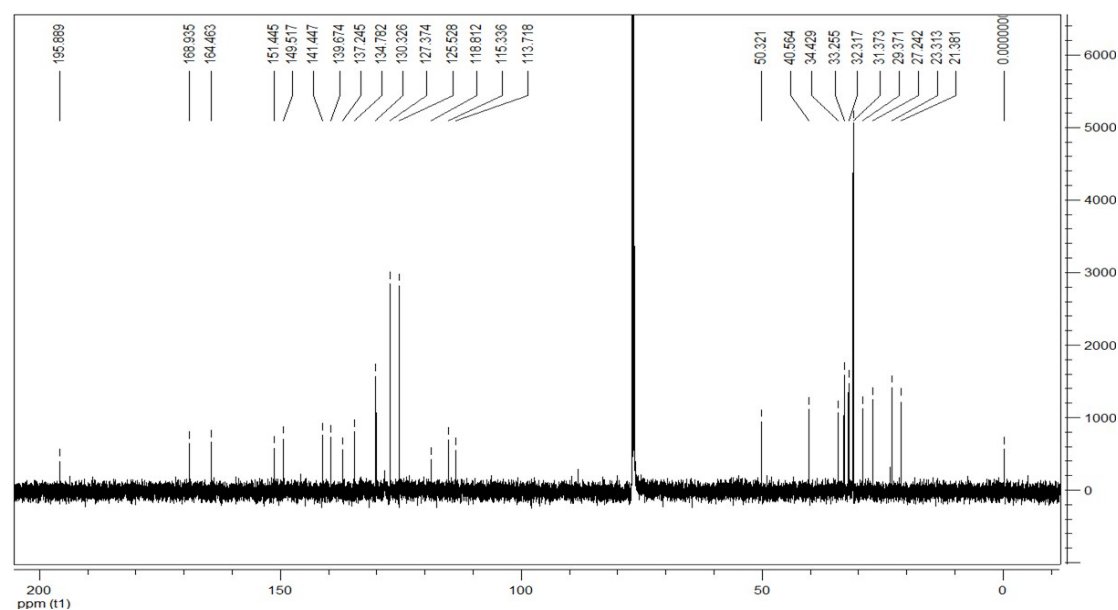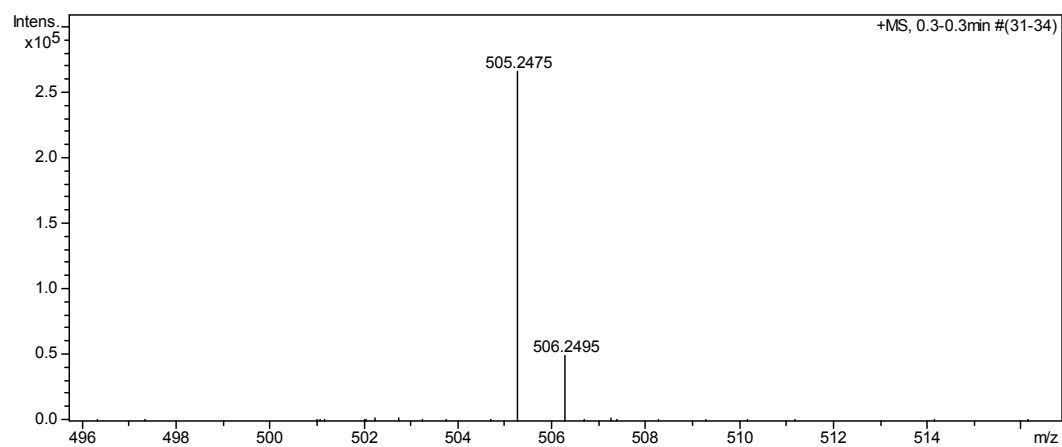

**2,7,7-Trimethyl-9-(4-nitrophenyl)-4-(*p*-tolyl)-6,7,8,9-tetrahydro-1*H*-pyrrolo[3,4-*b*]quinoline-1,3,5(2*H*,4*H*)-trione (3d):**

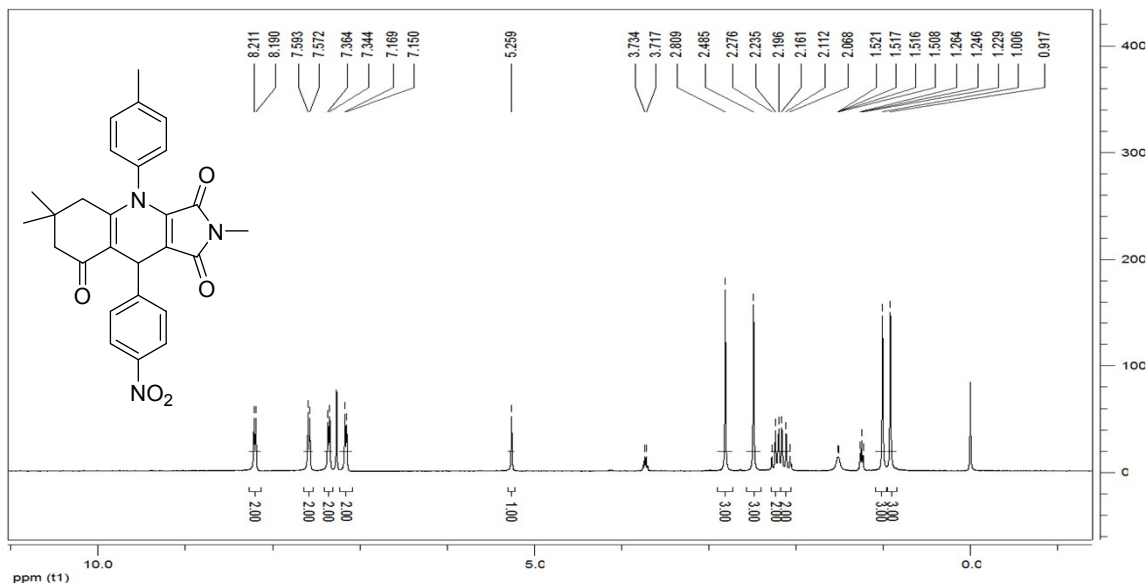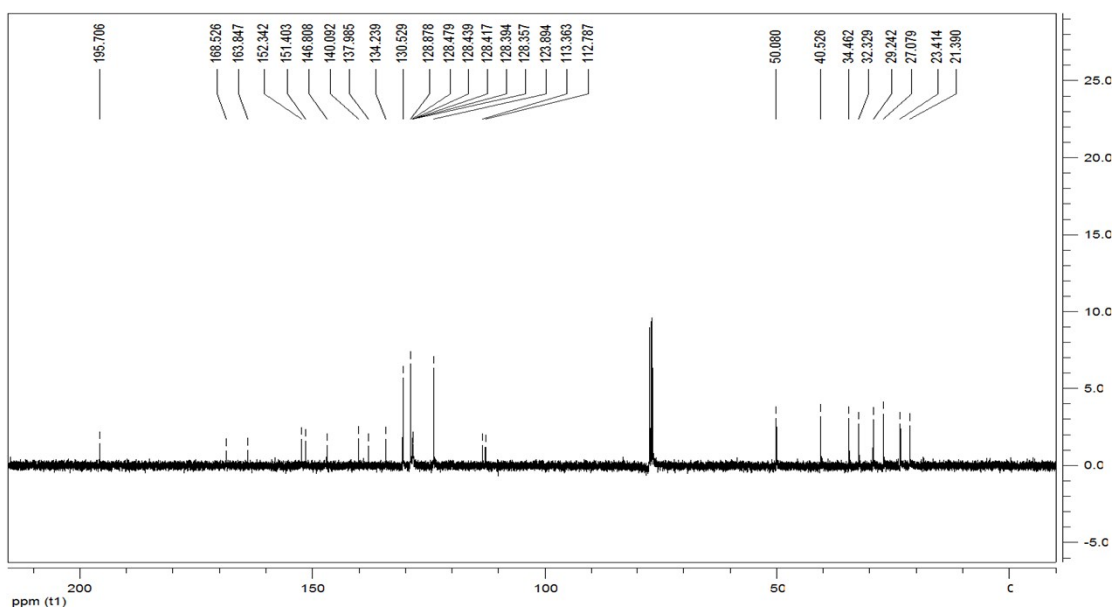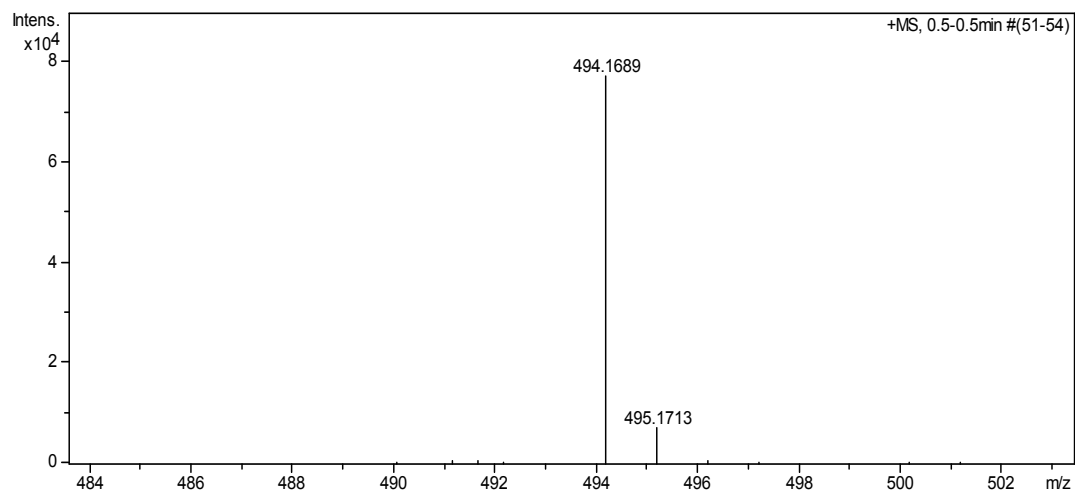

**2-Methyl-9-(4-nitrophenyl)-4-(*p*-tolyl)-6,7,8,9-tetrahydro-1*H*-pyrrolo[3,4-*b*]quinoline-1,3,5(2*H*,4*H*)-trione (3e):**

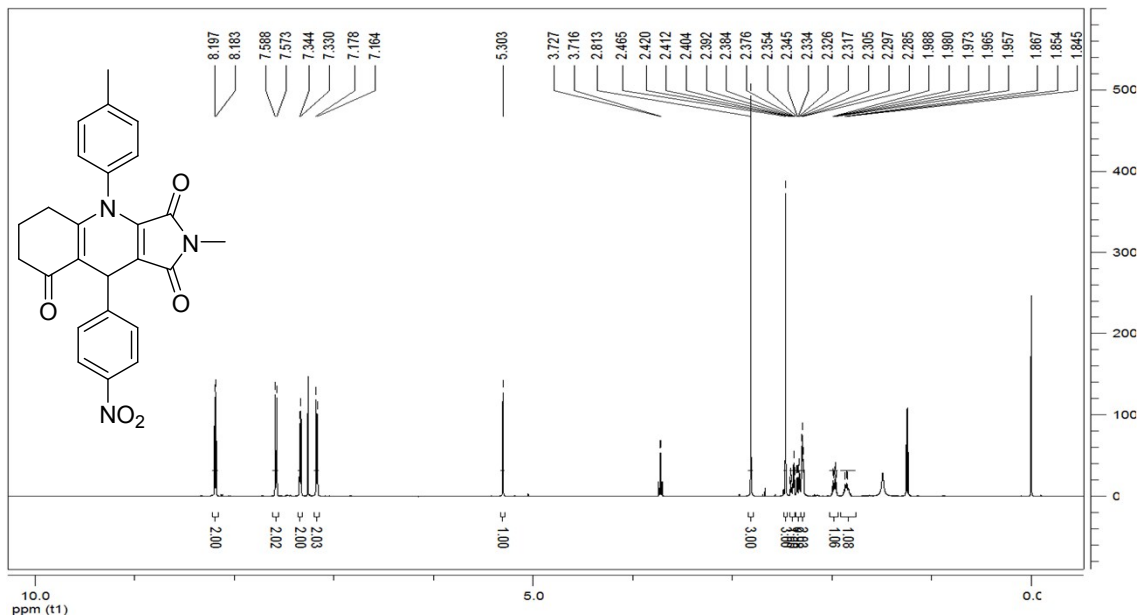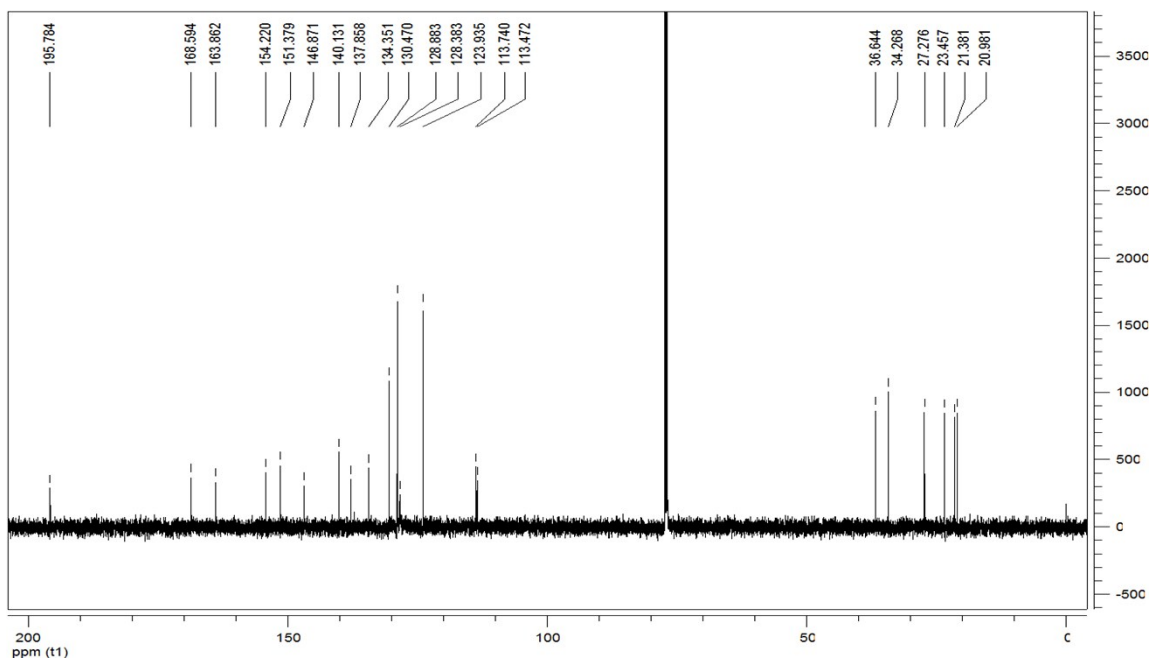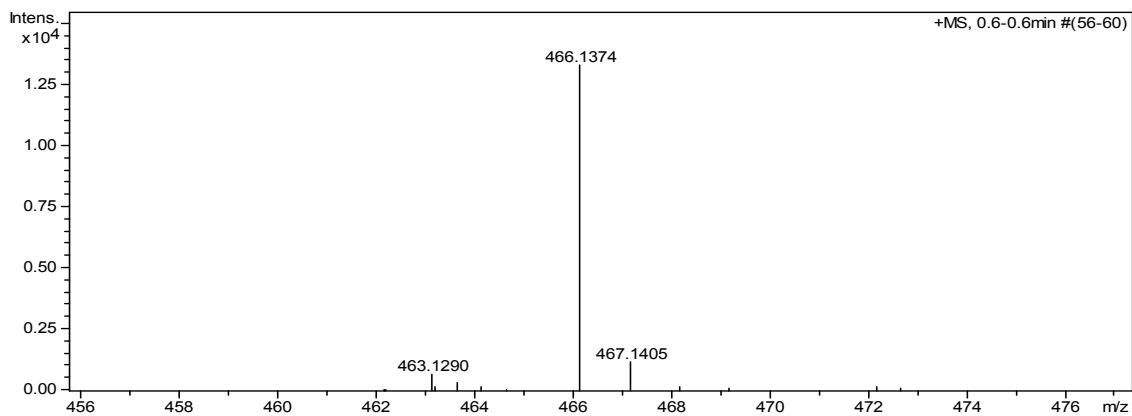

**2-Methyl-9-(4-methoxyphenyl)-4-phenyl-6,7,8,9-tetrahydro-1H-pyrrolo[3,4-b]quinoline-1,3,5(2H,4H)-trione (3f):**

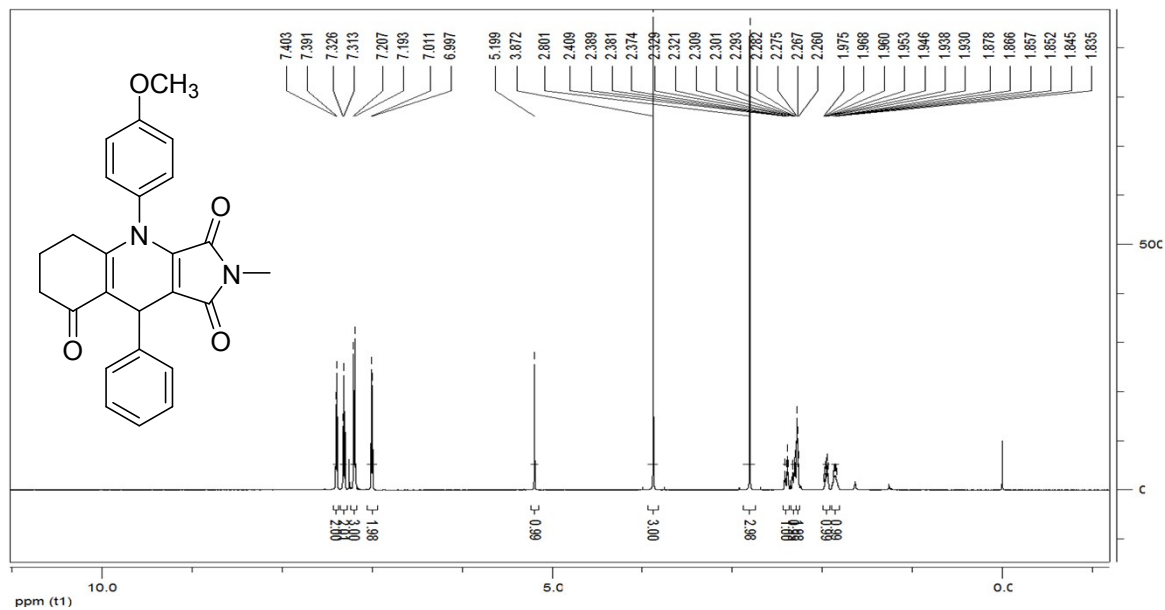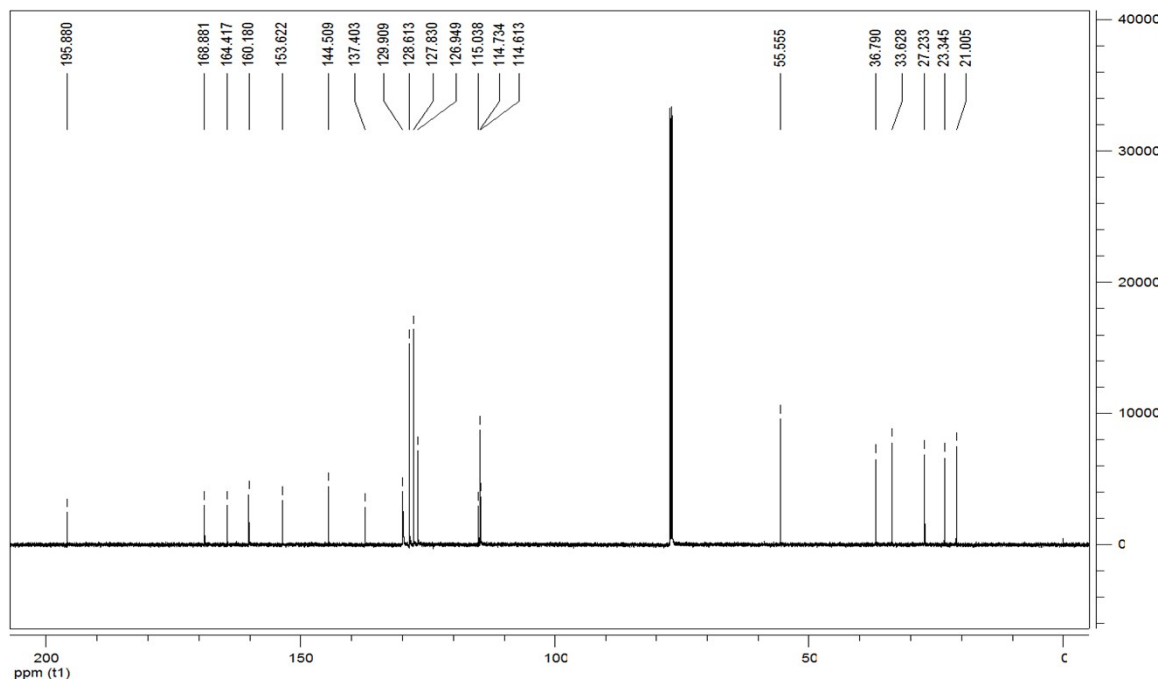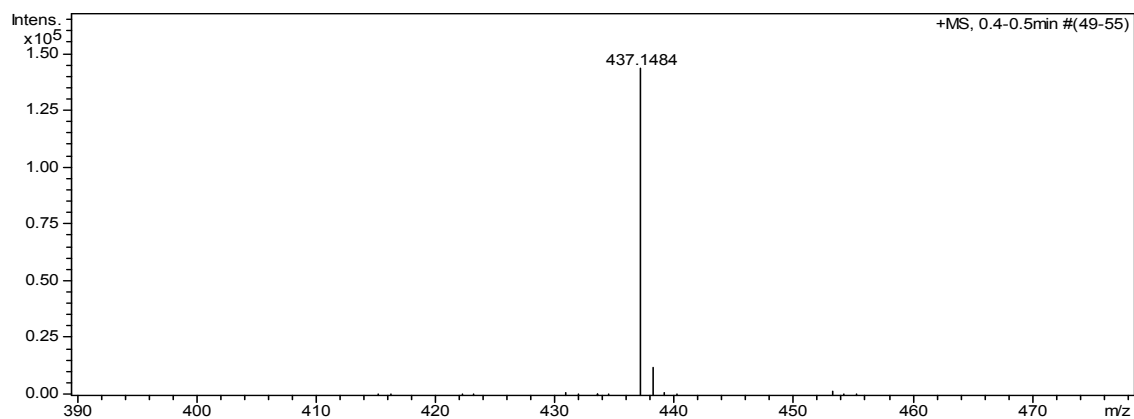



**4-(4-Methoxyphenyl)-2,7,7-trimethyl-9-(4-nitrophenyl)-6,7,8,9-tetrahydro-1H-pyrrolo[3,4-b]quinoline-1,3,5(2H,4H)-trion (3g):**

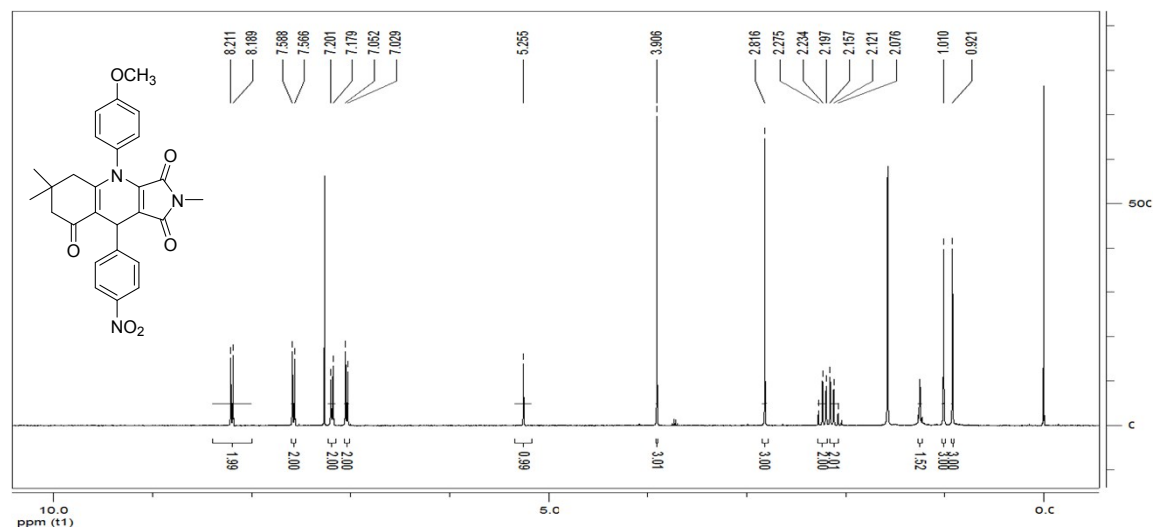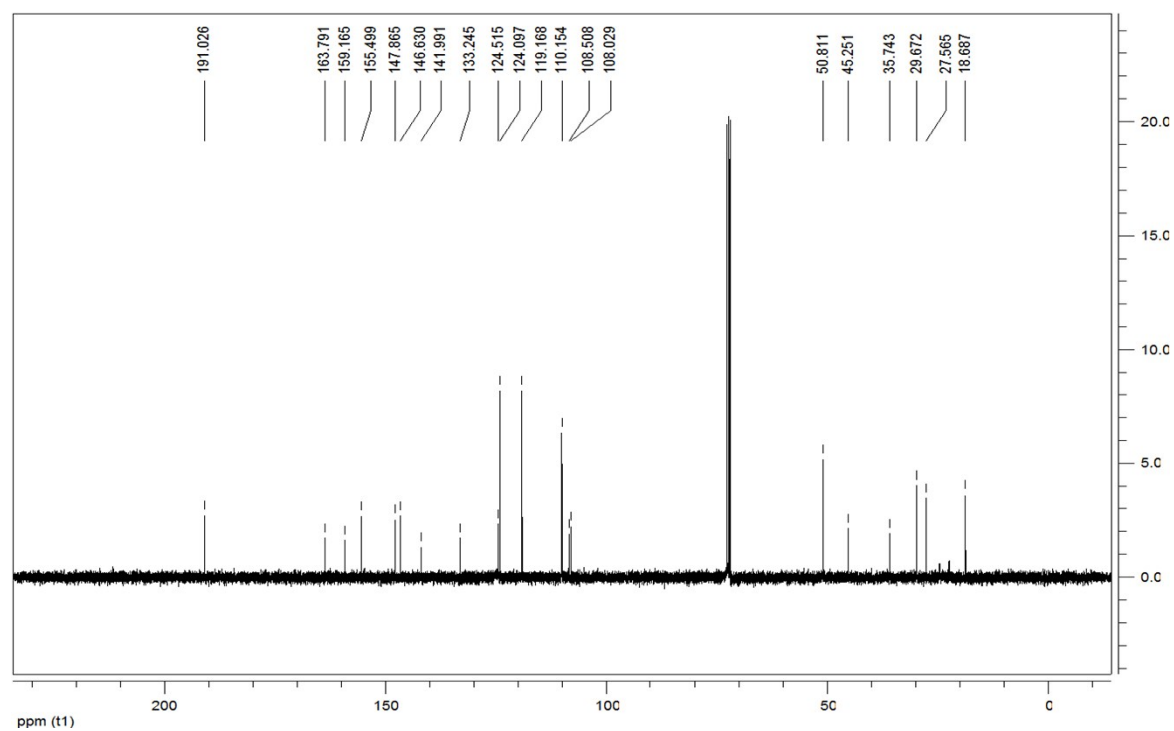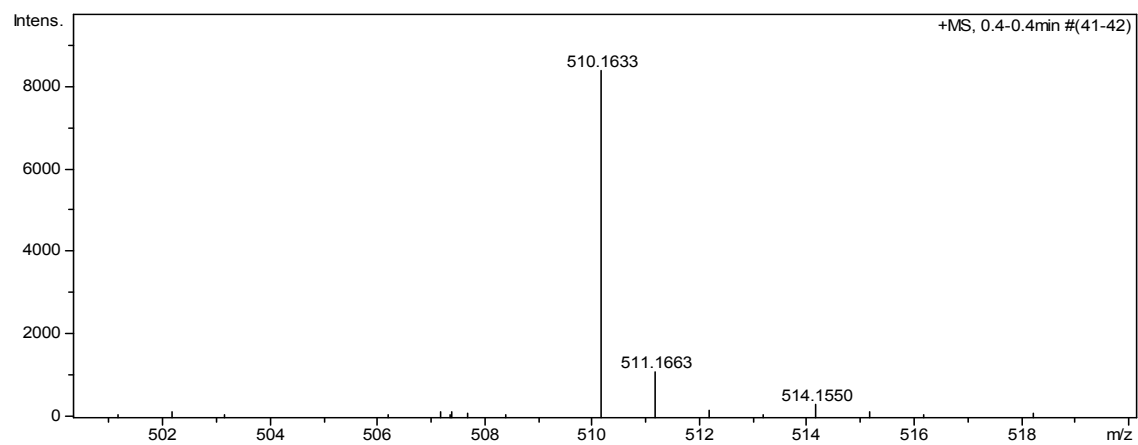

**4-(4-Chlorophenyl)-2-methyl-9-(*p*-tolyl)-6,7,8,9-tetrahydro-1*H*-pyrrolo[3,4-*b*]quinoline-1,3,5(2*H*,4*H*)-trione (3h):**

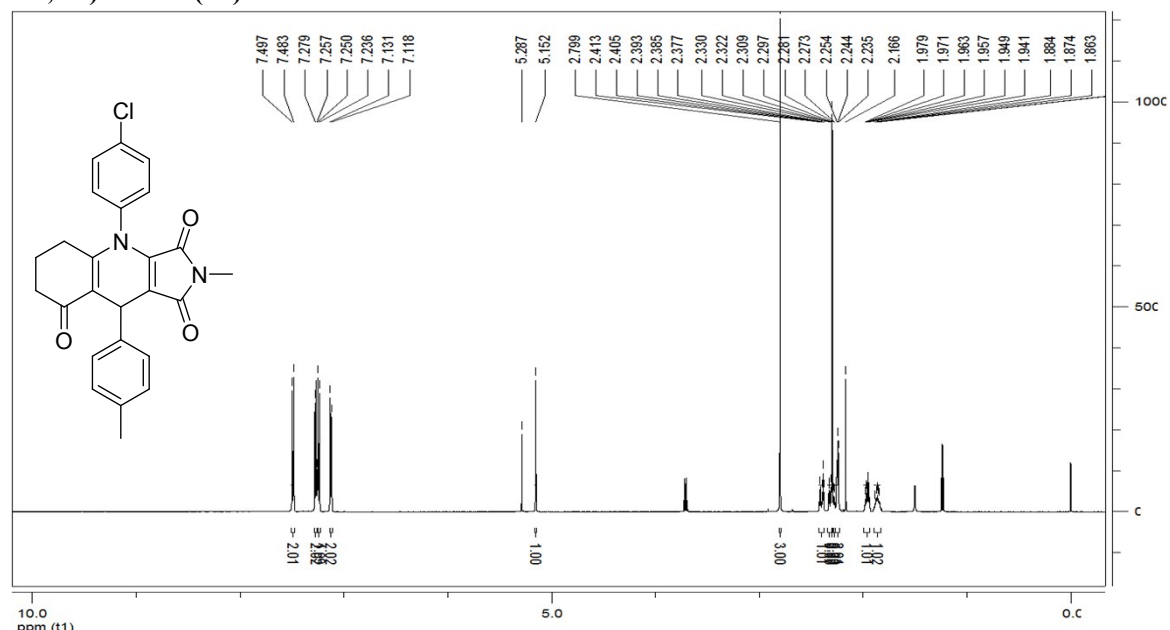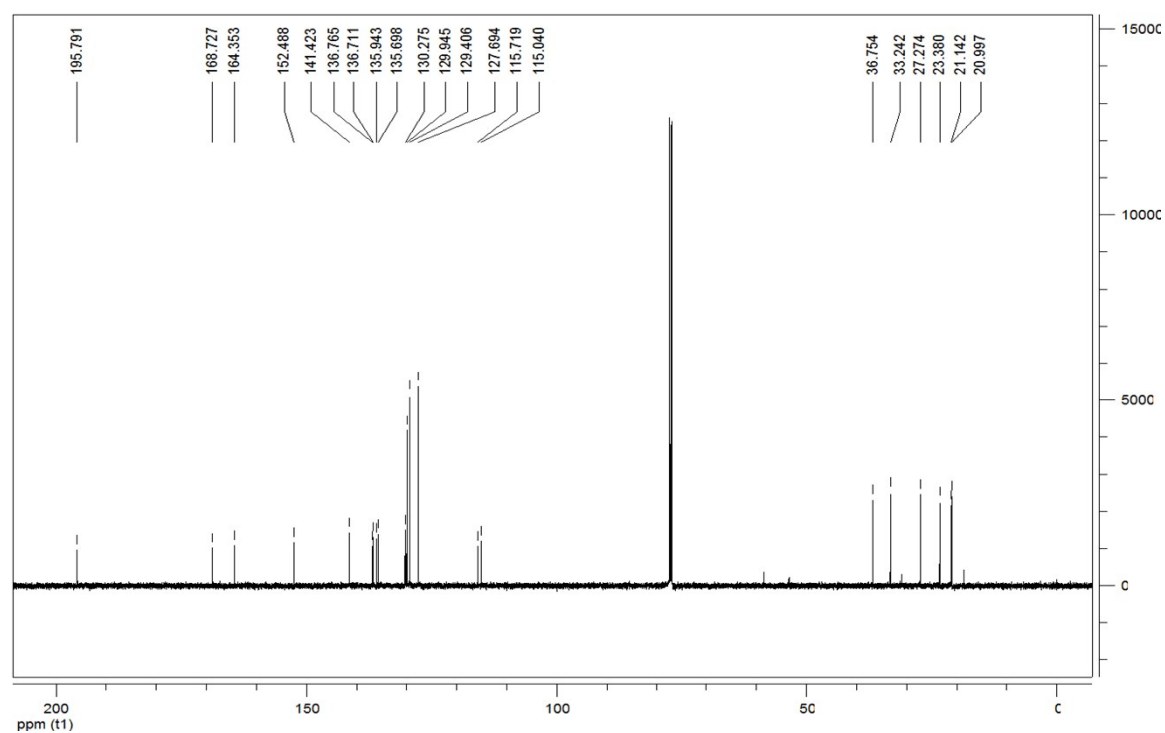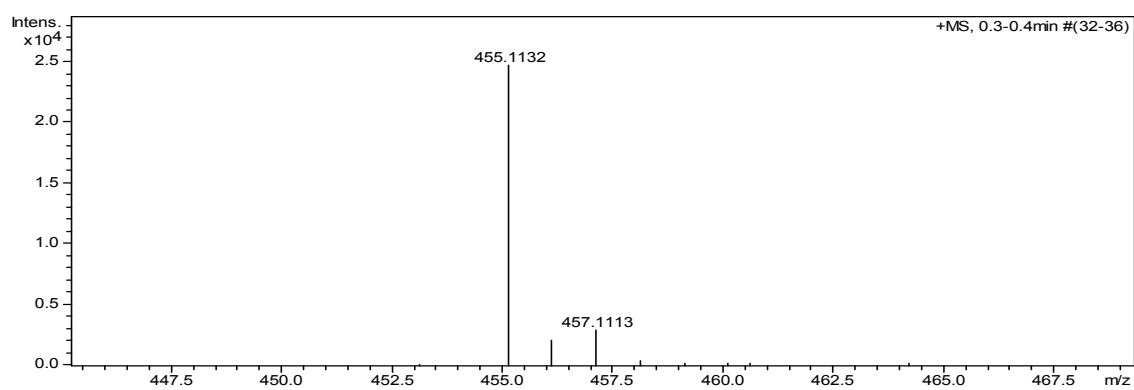

**4-(4-Chlorophenyl)-2,7,7-trimethyl-9-(4-nitrophenyl)-6,7,8,9-tetrahydro-1H-pyrrolo[3,4-b]quinoline-1,3,5(2H,4H)-trione (3i):**

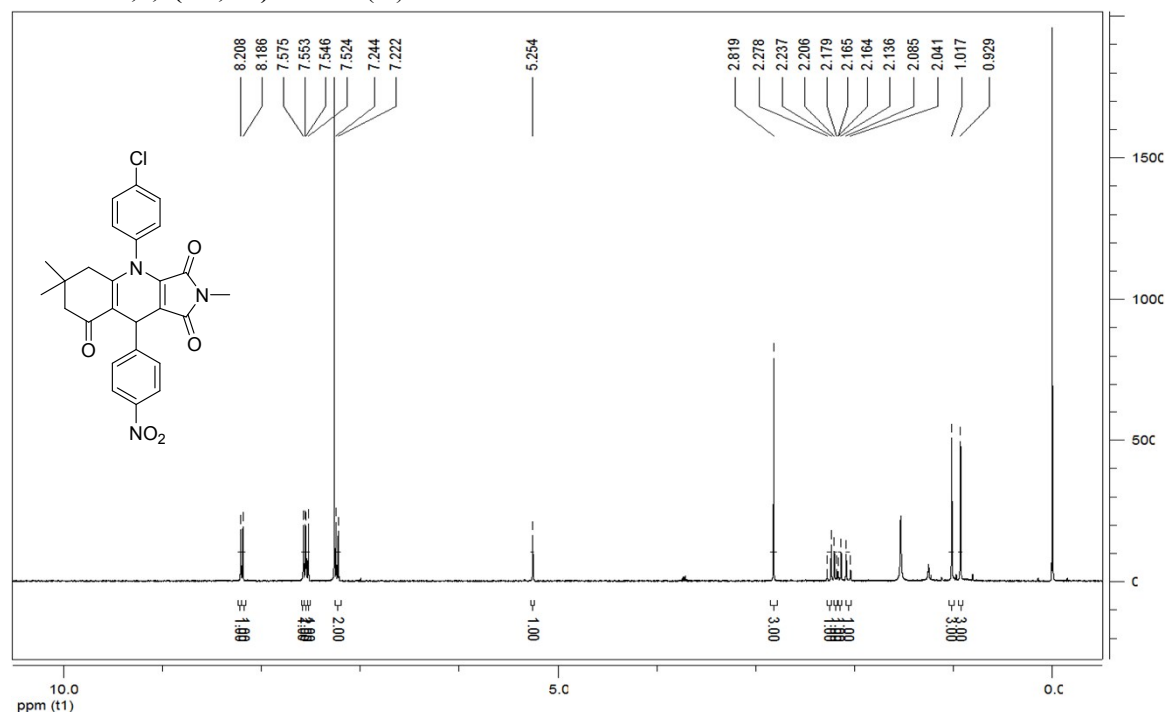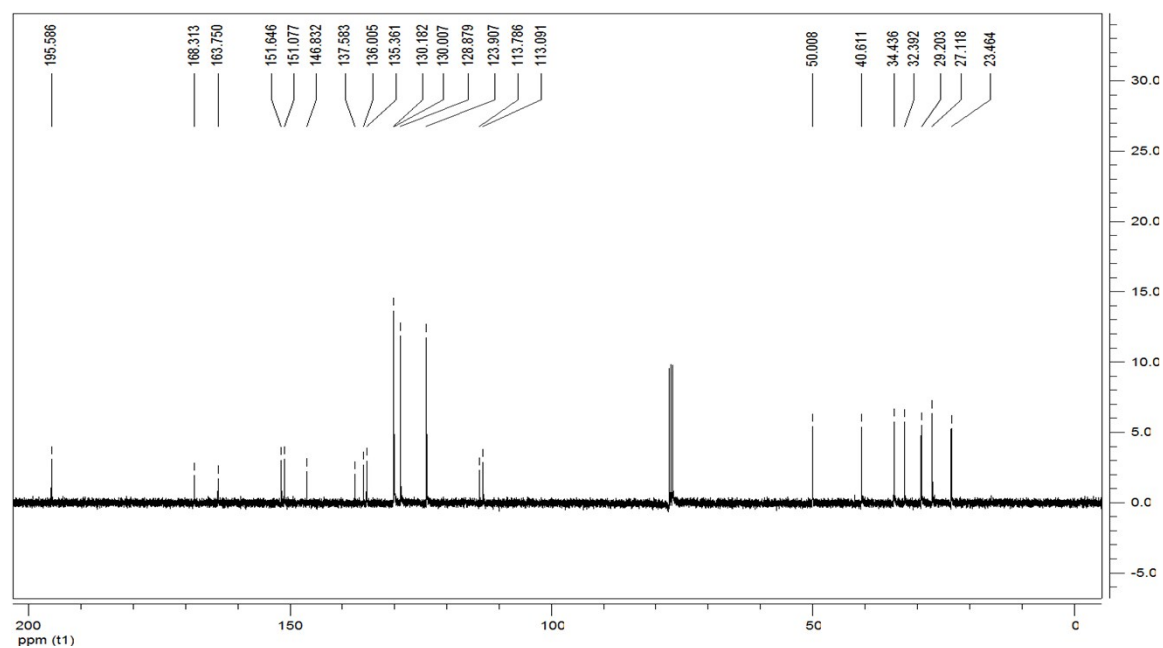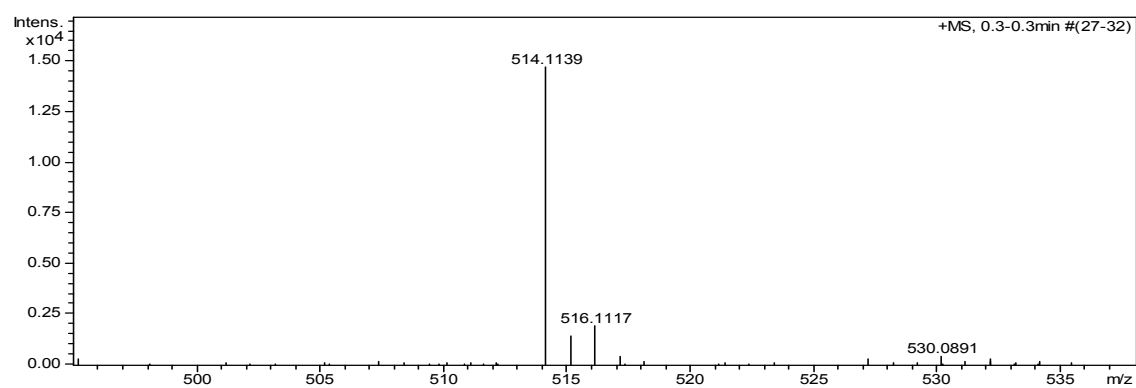

**4-(4-Bromophenyl)-2-methyl-9-(*p*-tolyl)-6,7,8,9-tetrahydro-1*H*-pyrrolo[3,4-*b*]quinoline-1,3,5(2*H*,4*H*)-trione (3j):**

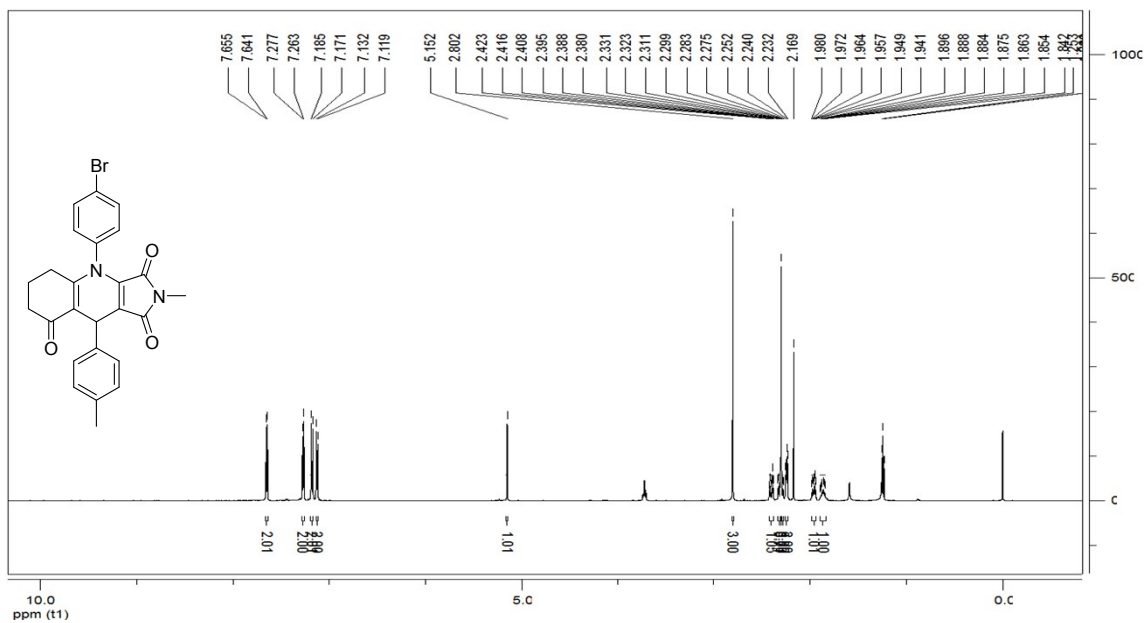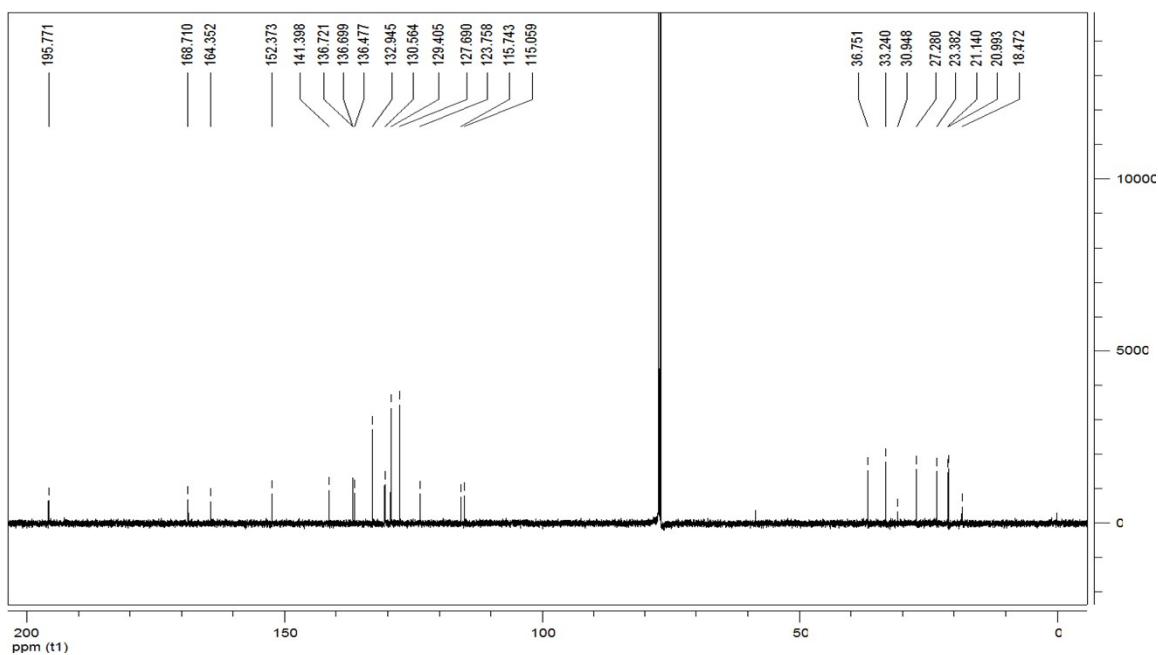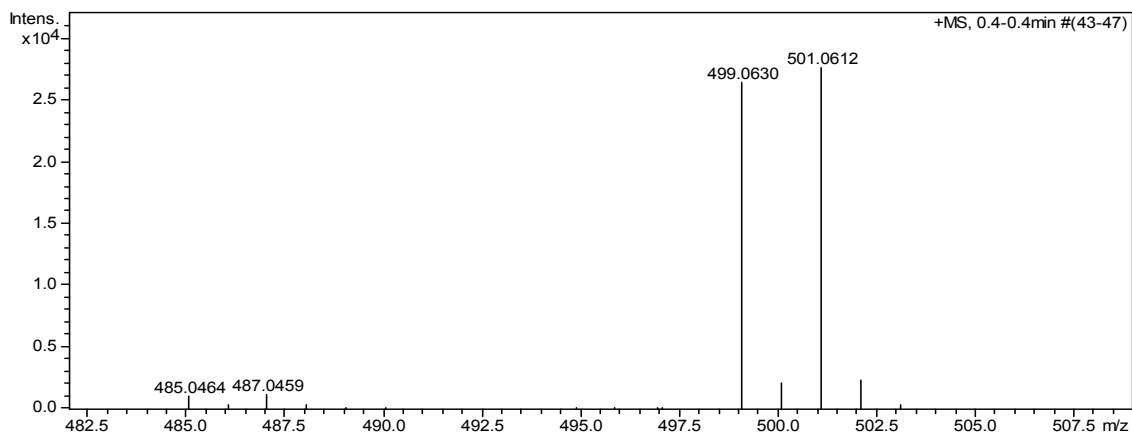

**3-((4-Chlorophenyl)amino)-4-((2-hydroxy-4,4-dimethyl-6-oxocyclohex-1-en-1-yl)(4-methoxyphenyl)methyl)-1-methyl-1H-pyrrole-2,5-dione (2a):**

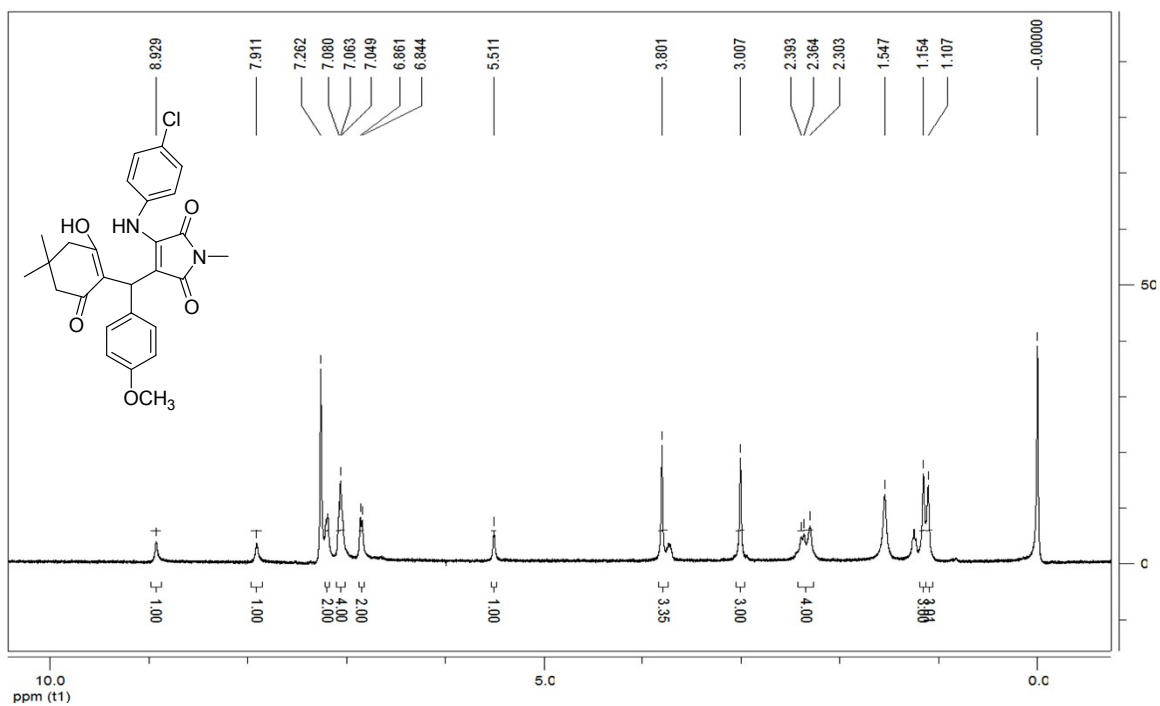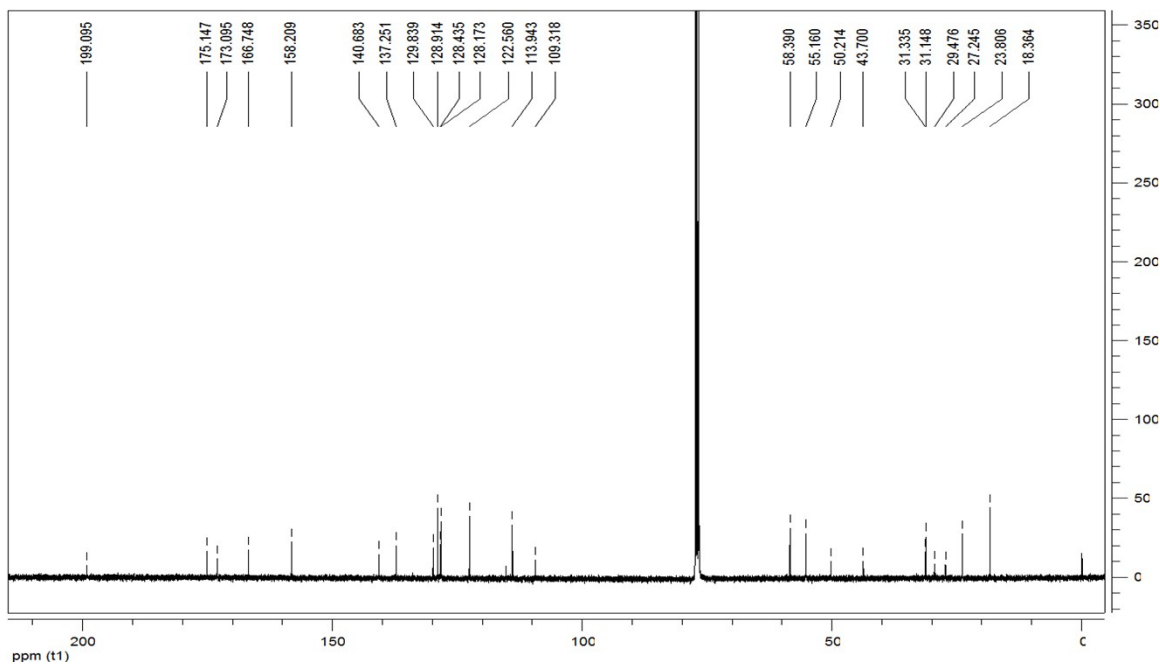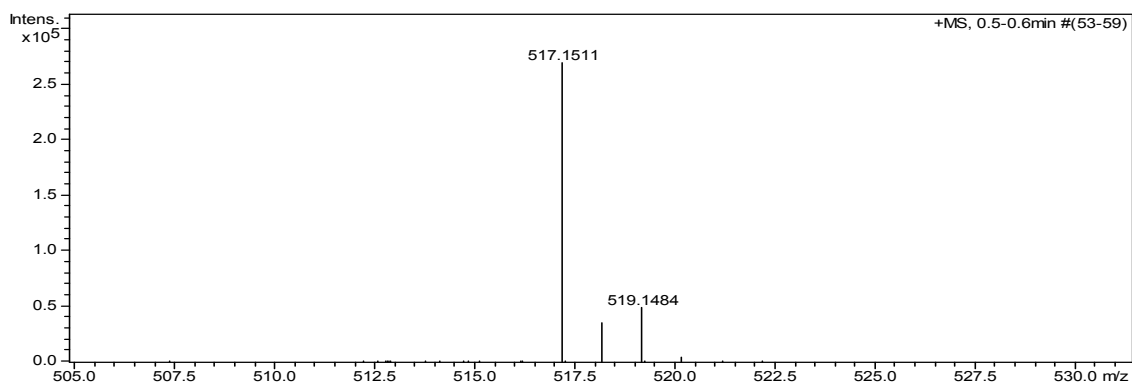

**3-((4-Chlorophenyl)amino)-4-((2-hydroxy-4,4-dimethyl-6-oxocyclohex-1-en-1-yl)(*p*-tolyl)methyl)-1-methyl-1*H*-pyrrole-2,5-dione (2b):**

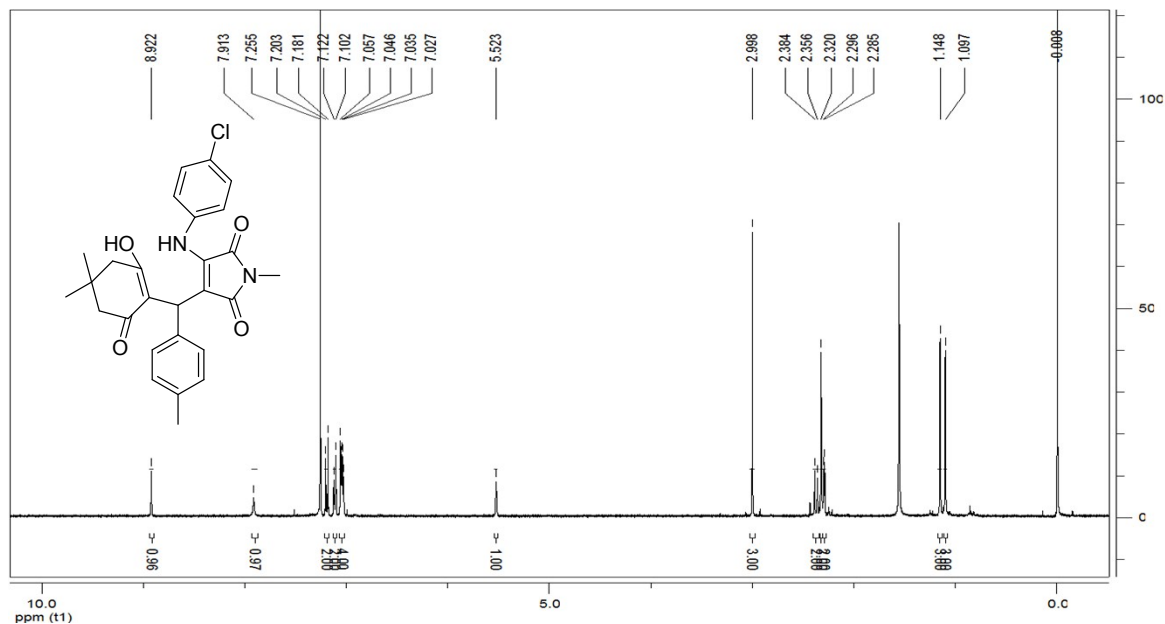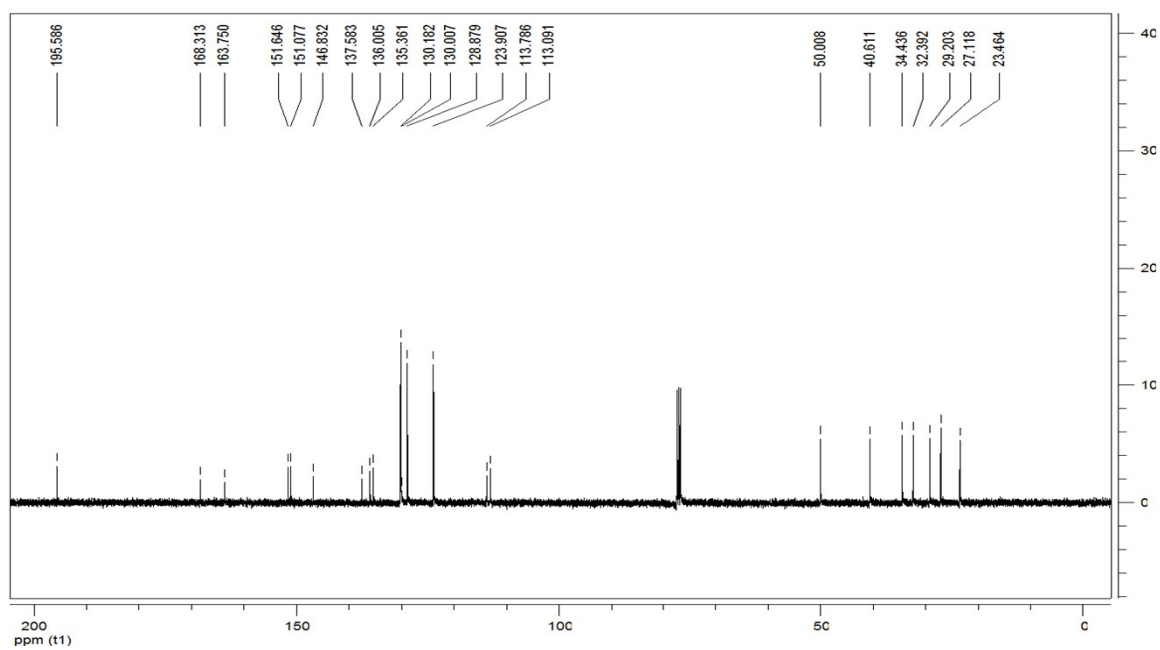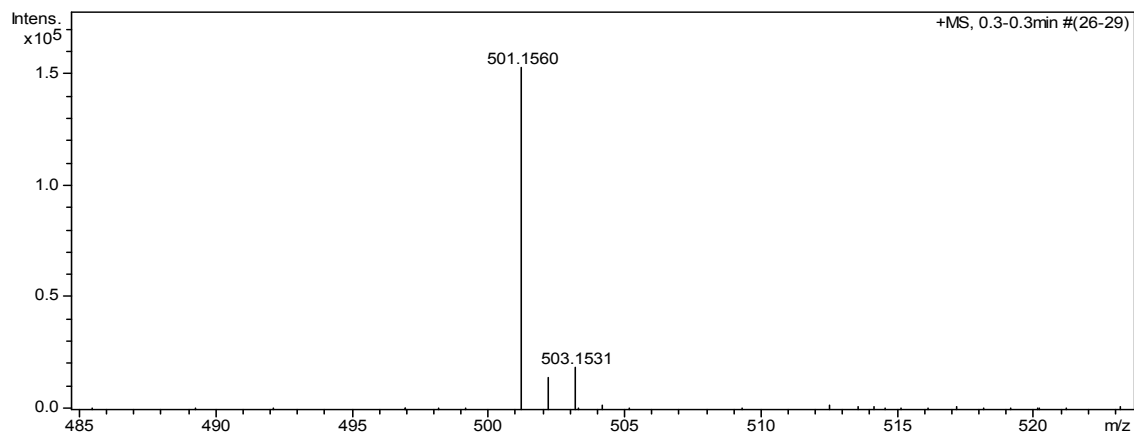

**3-((4-hydroxy-2-oxo-2H-chromen-3-yl)(phenyl)methyl)-1-methyl-4-(p-tolylamino)-1H-pyrrole-2,5-dione (4a):**

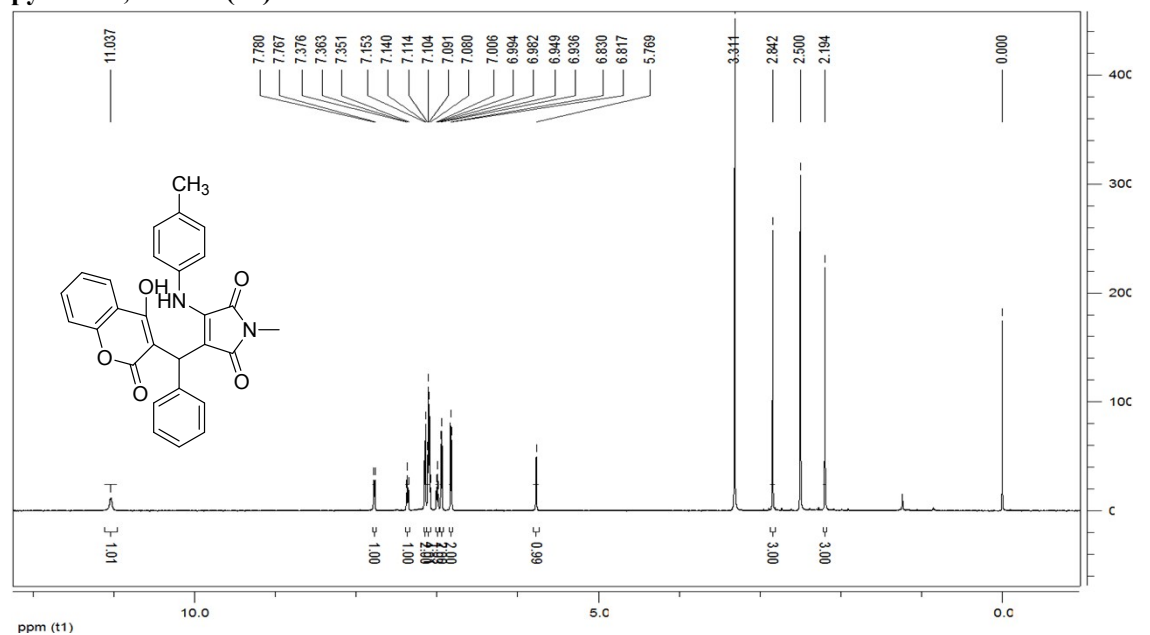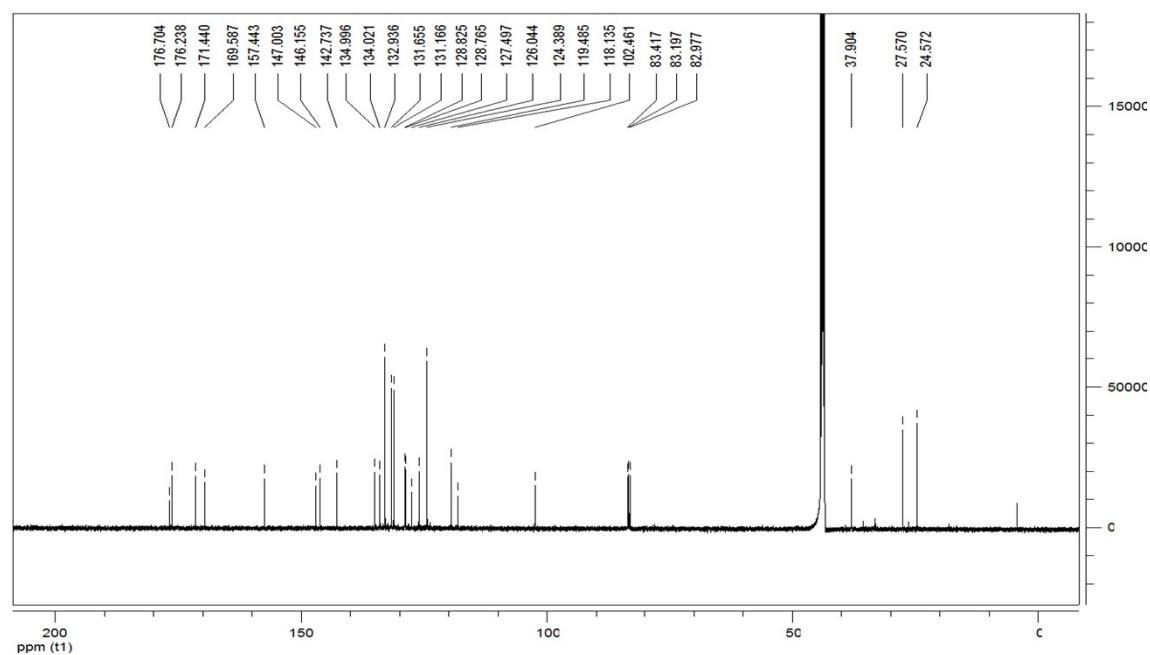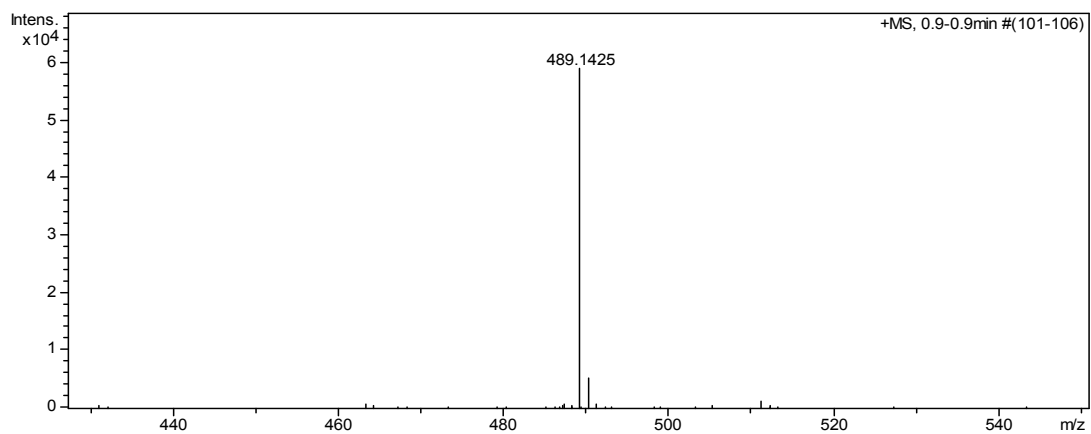

**3-((4-hydroxy-2-oxo-2*H*-chromen-3-yl)(4-nitrophenyl)methyl)-1-methyl-4-(*p*-tolylamino)-1*H*-pyrrole-2,5-dione (4b):**

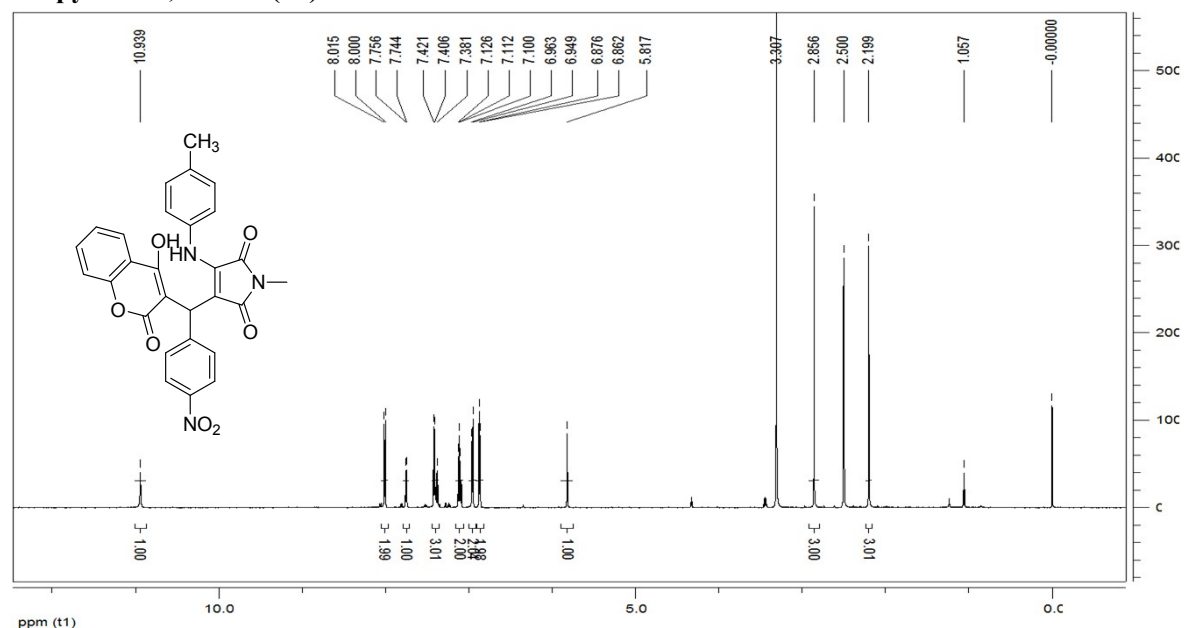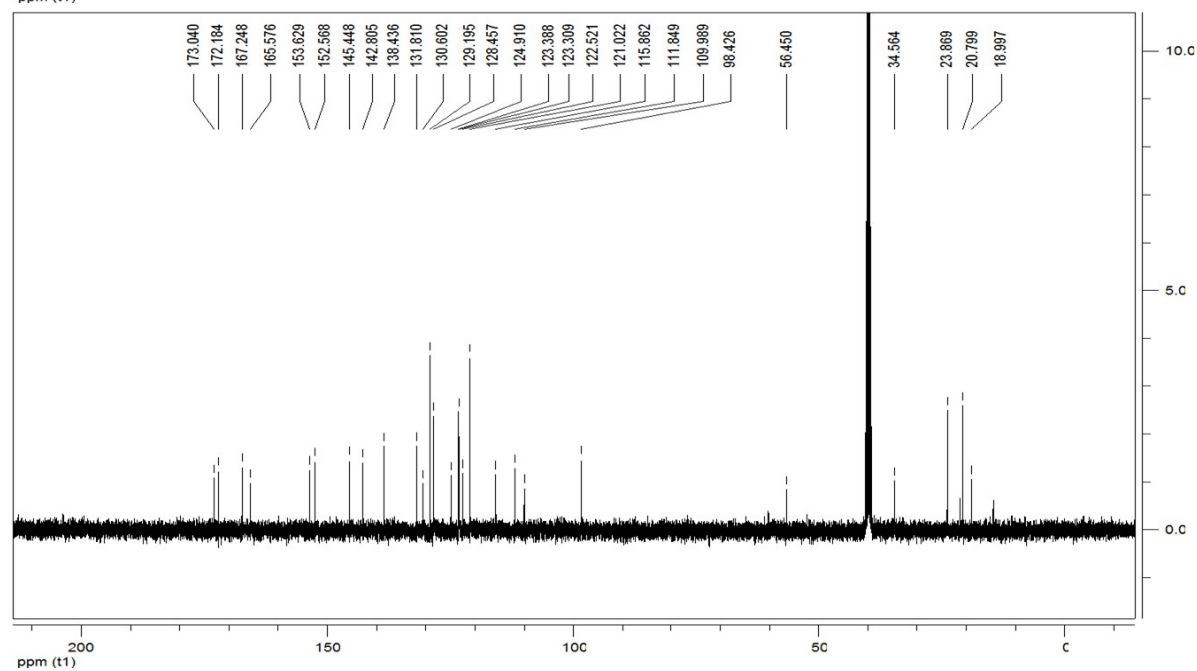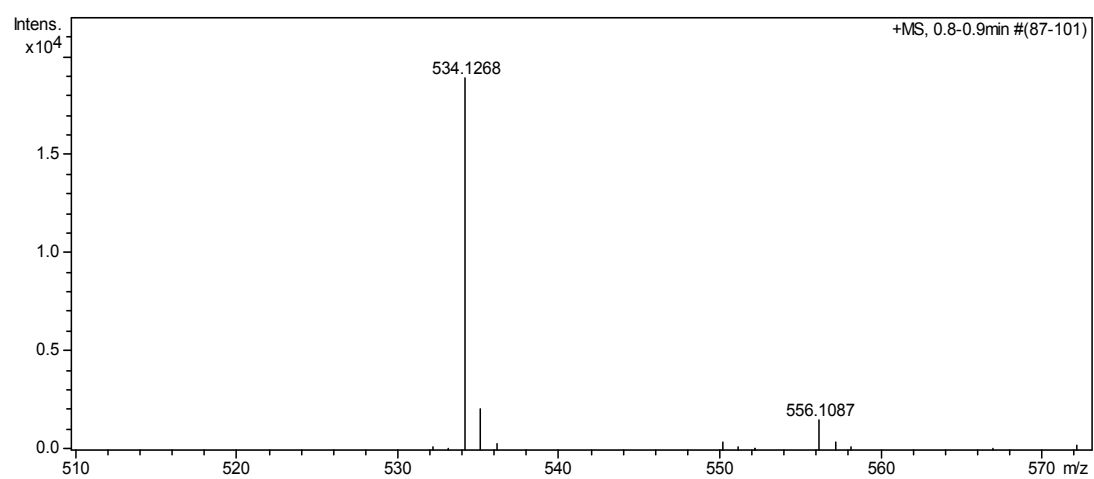

Supplement: c6ra03165j1.pdf [file c6ra03165j1.pdf]
